# Supplementary material for: Predictors of Occupational Burnout: A Systematic Review
Source: Int J Environ Res Public Health. 2021 Aug 31;18(17):9188. doi: 10.3390/ijerph18179188 (PMC8430894; doi:10.3390/ijerph18179188)
Supplement: Supplementary file 1 [file ijerph-18-09188-s001.zip]

Archive with 4 entries (4 files):
- Figure S1.pdf
- Table S1.pdf
- Table S2.pdf
- Table S3.pdf
