# Supplementary material for: Predictors of Occupational Burnout: A Systematic Review
Source: Int J Environ Res Public Health. 2021 Aug 31;18(17):9188. doi: 10.3390/ijerph18179188 (PMC8430894; doi:10.3390/ijerph18179188)
Supplement: Supplementary file 1 [file ijerph-18-09188-s001.zip › Table S3.pdf]

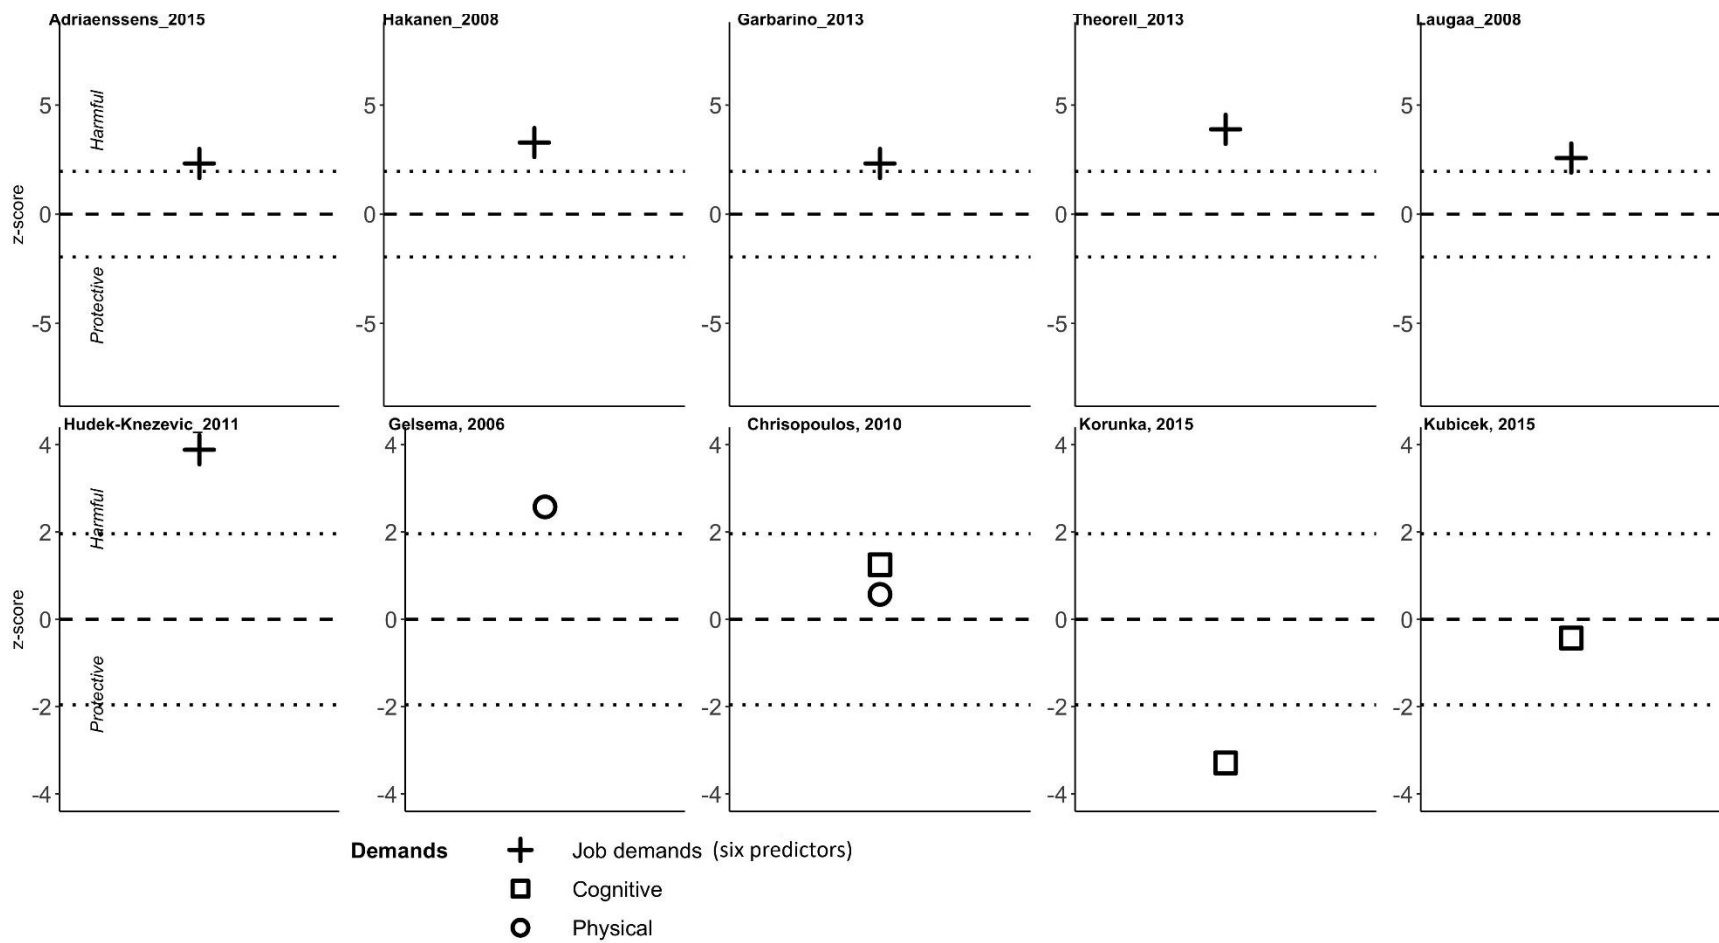

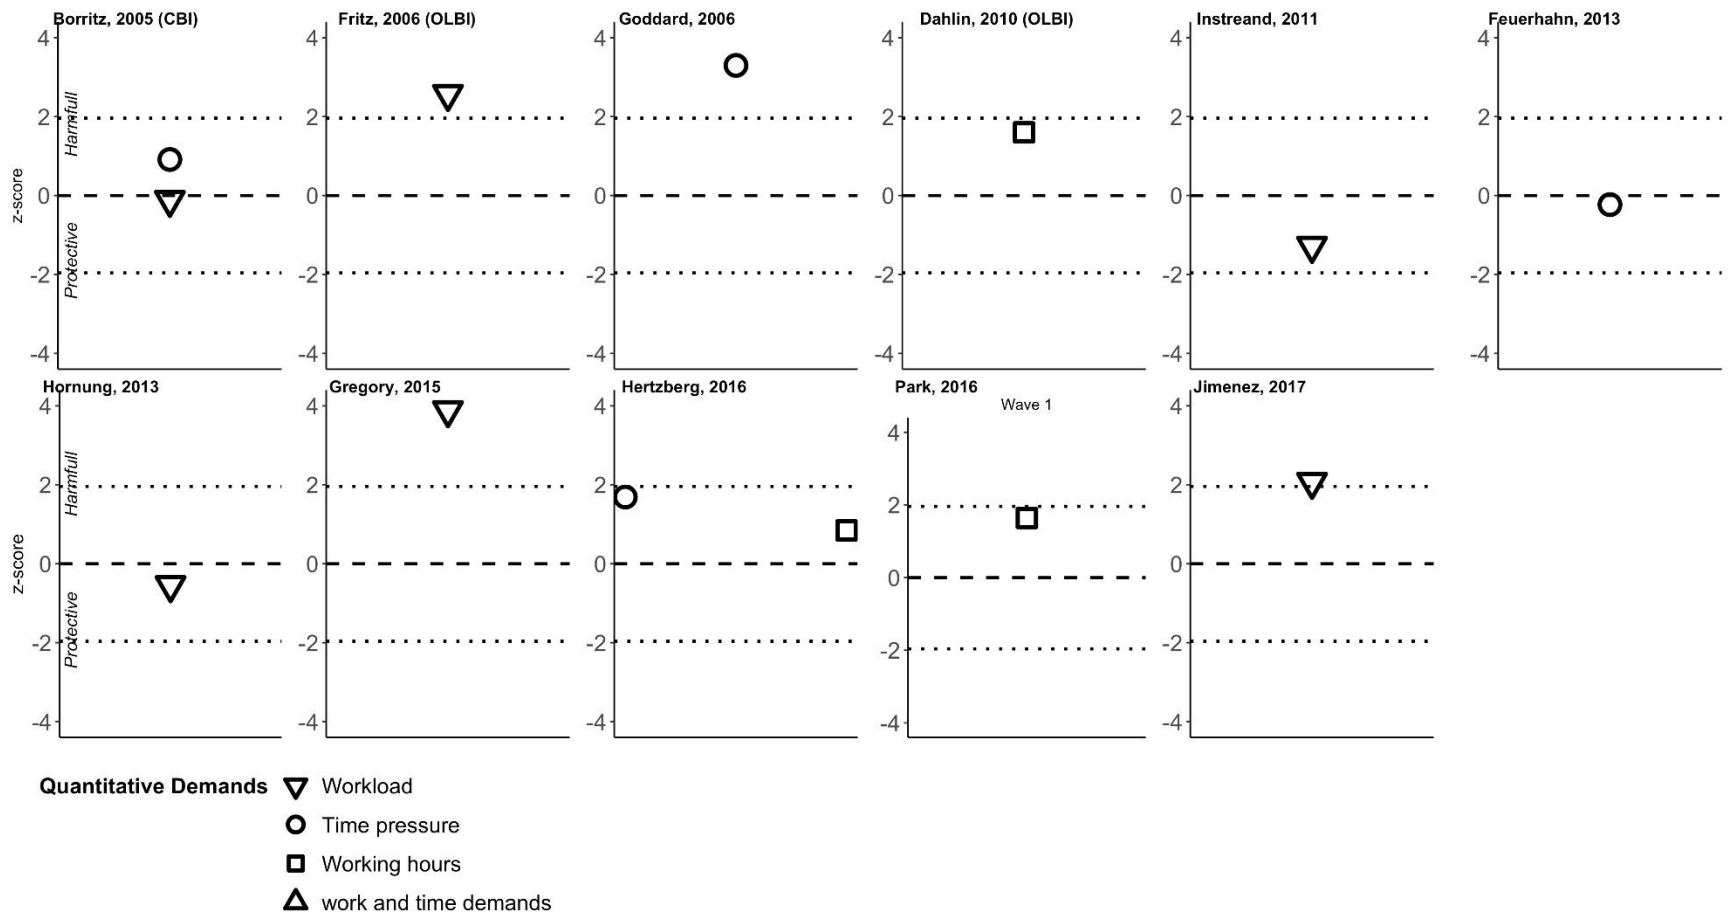

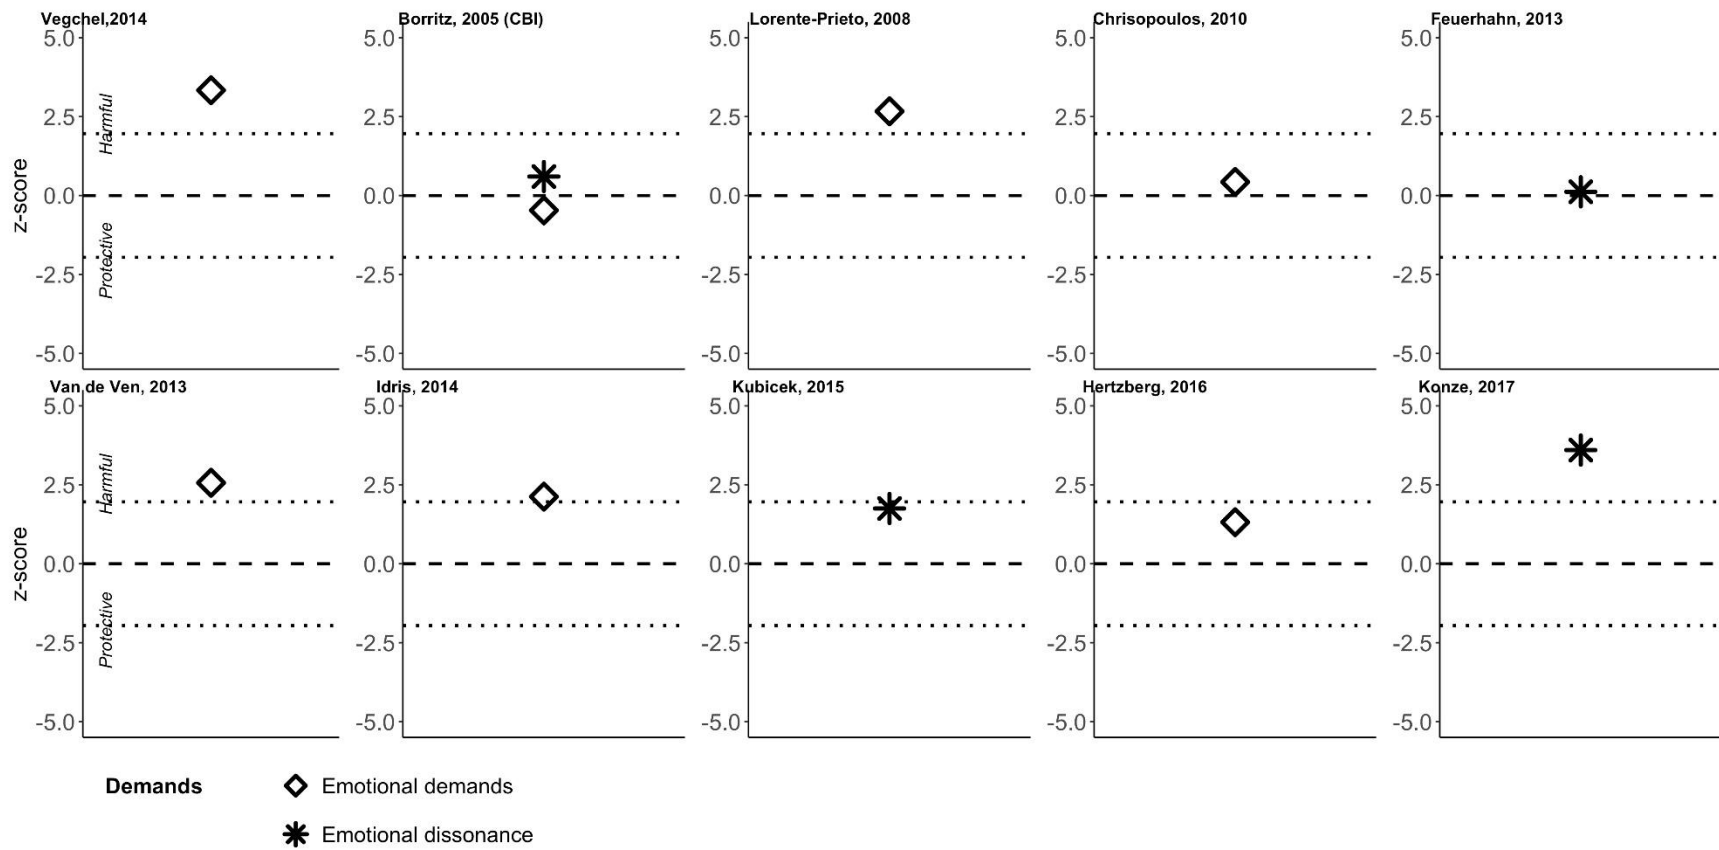

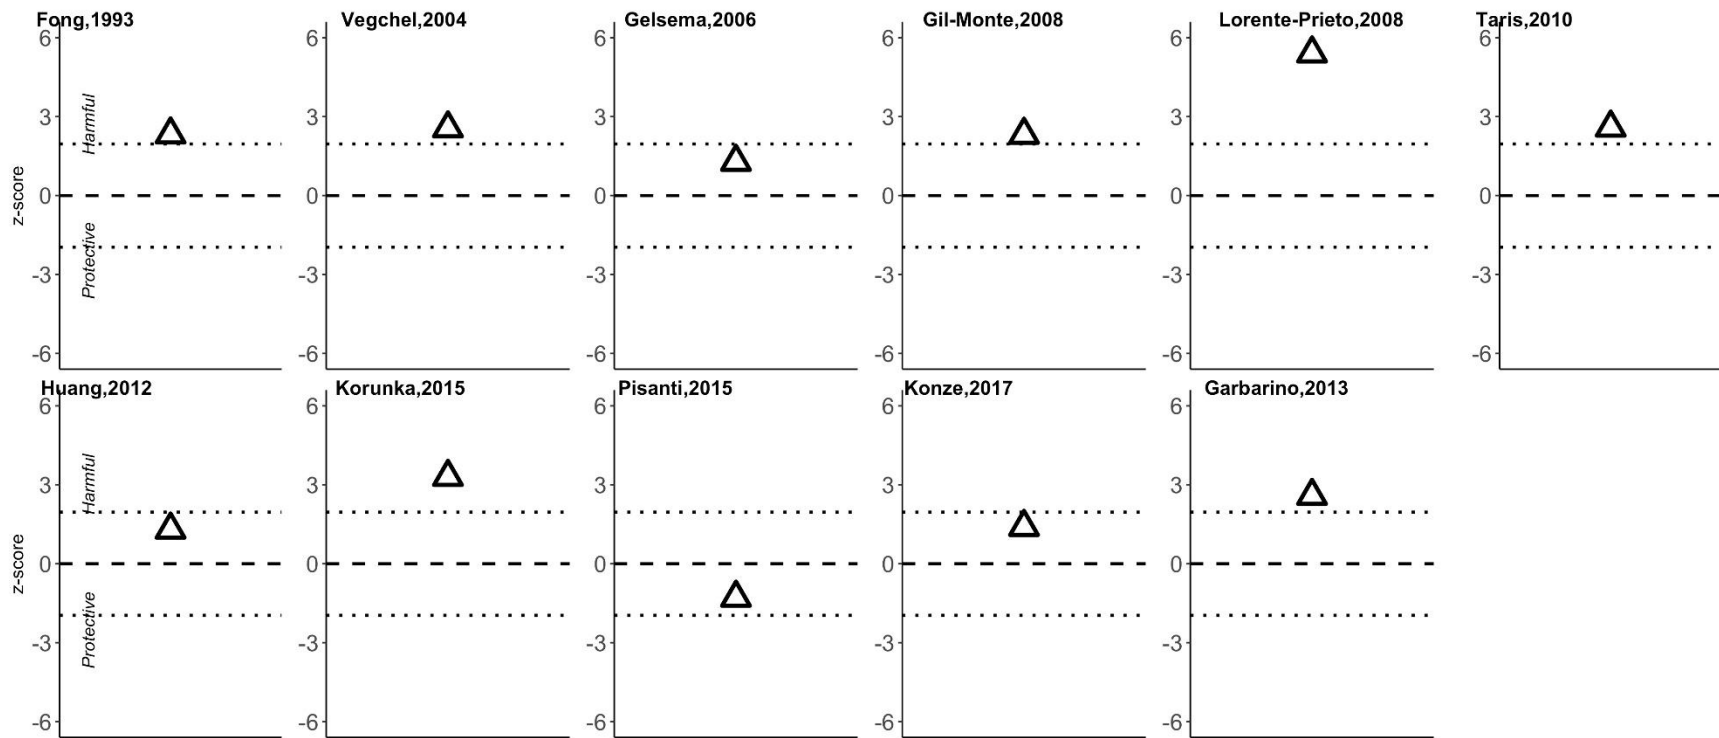

△ Work and time demands

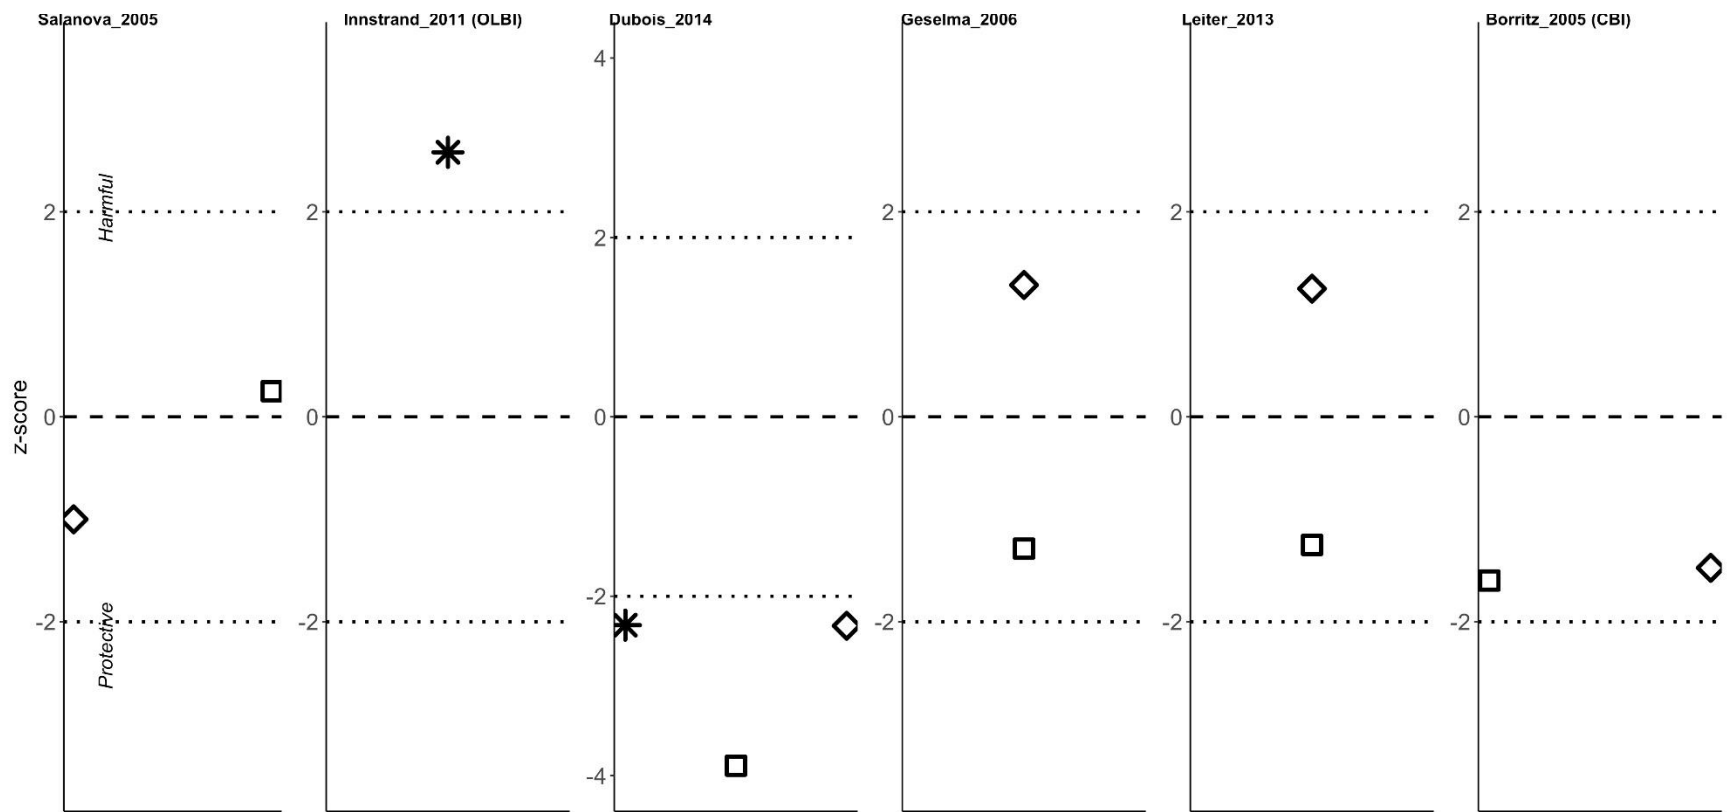

**Decision latitude**

- Decision authority
- Skill discretion (job variety)
- Autonomy

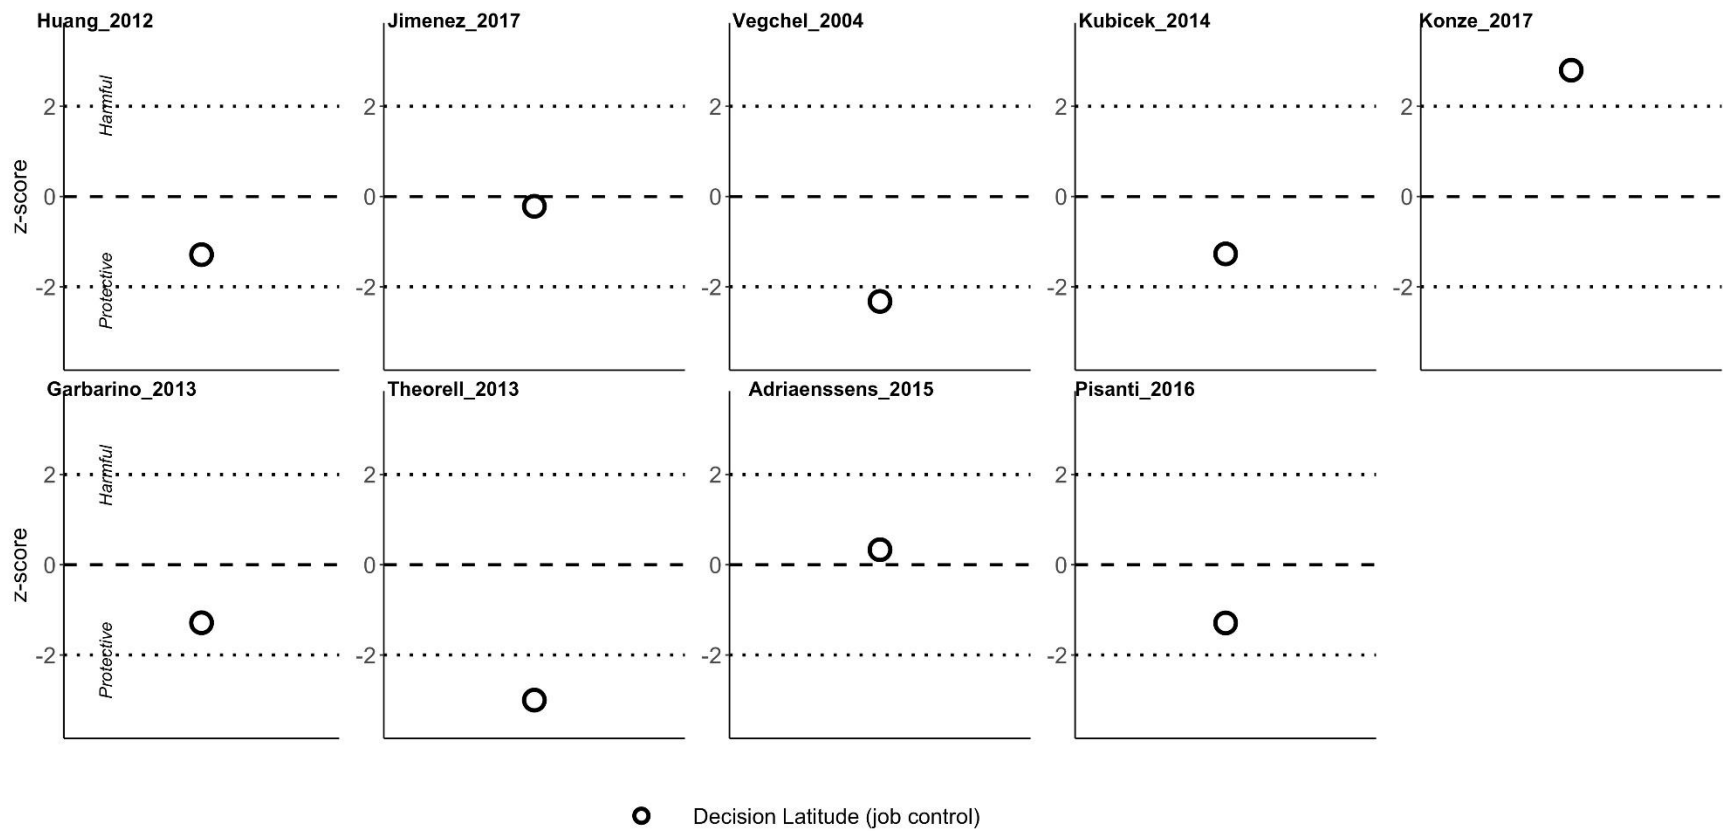

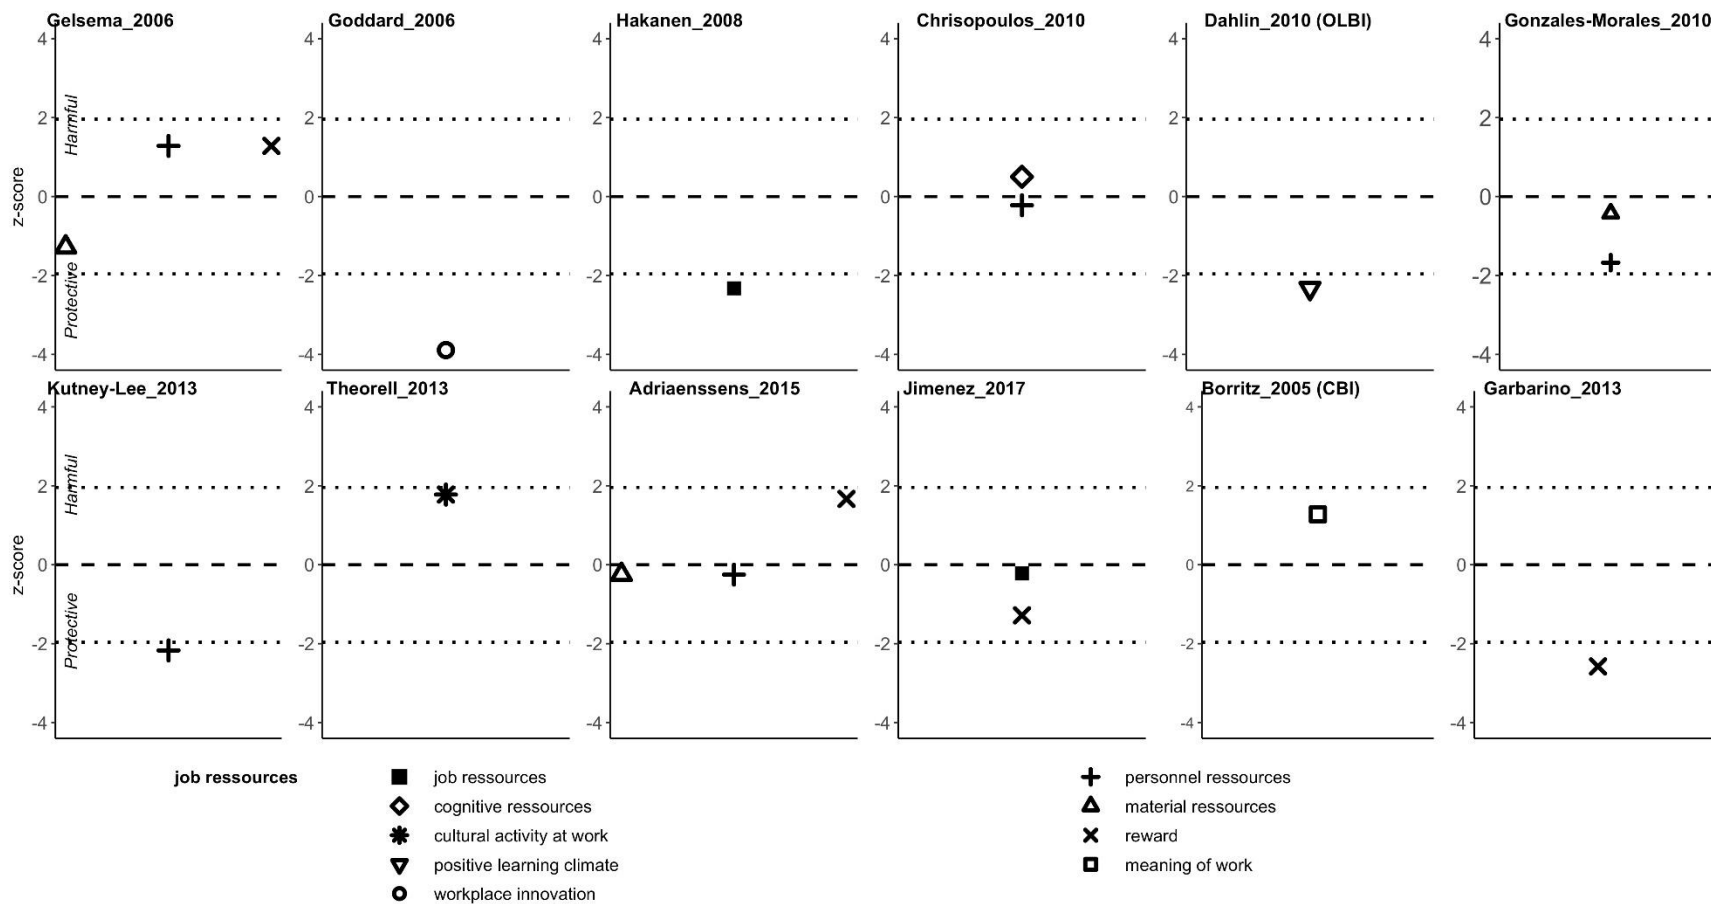

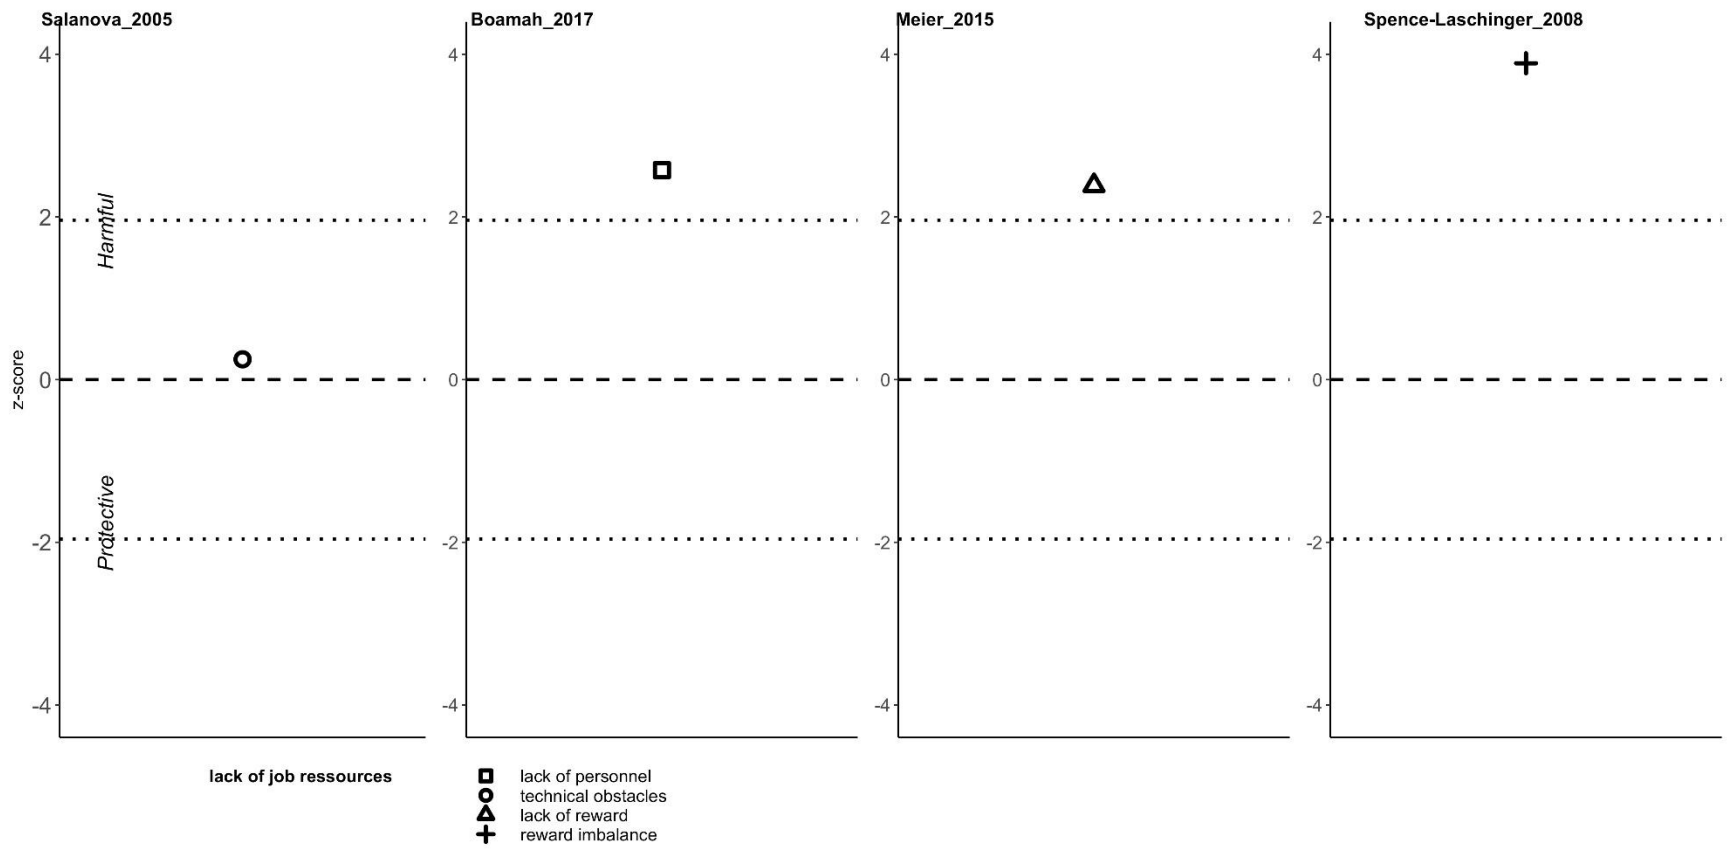

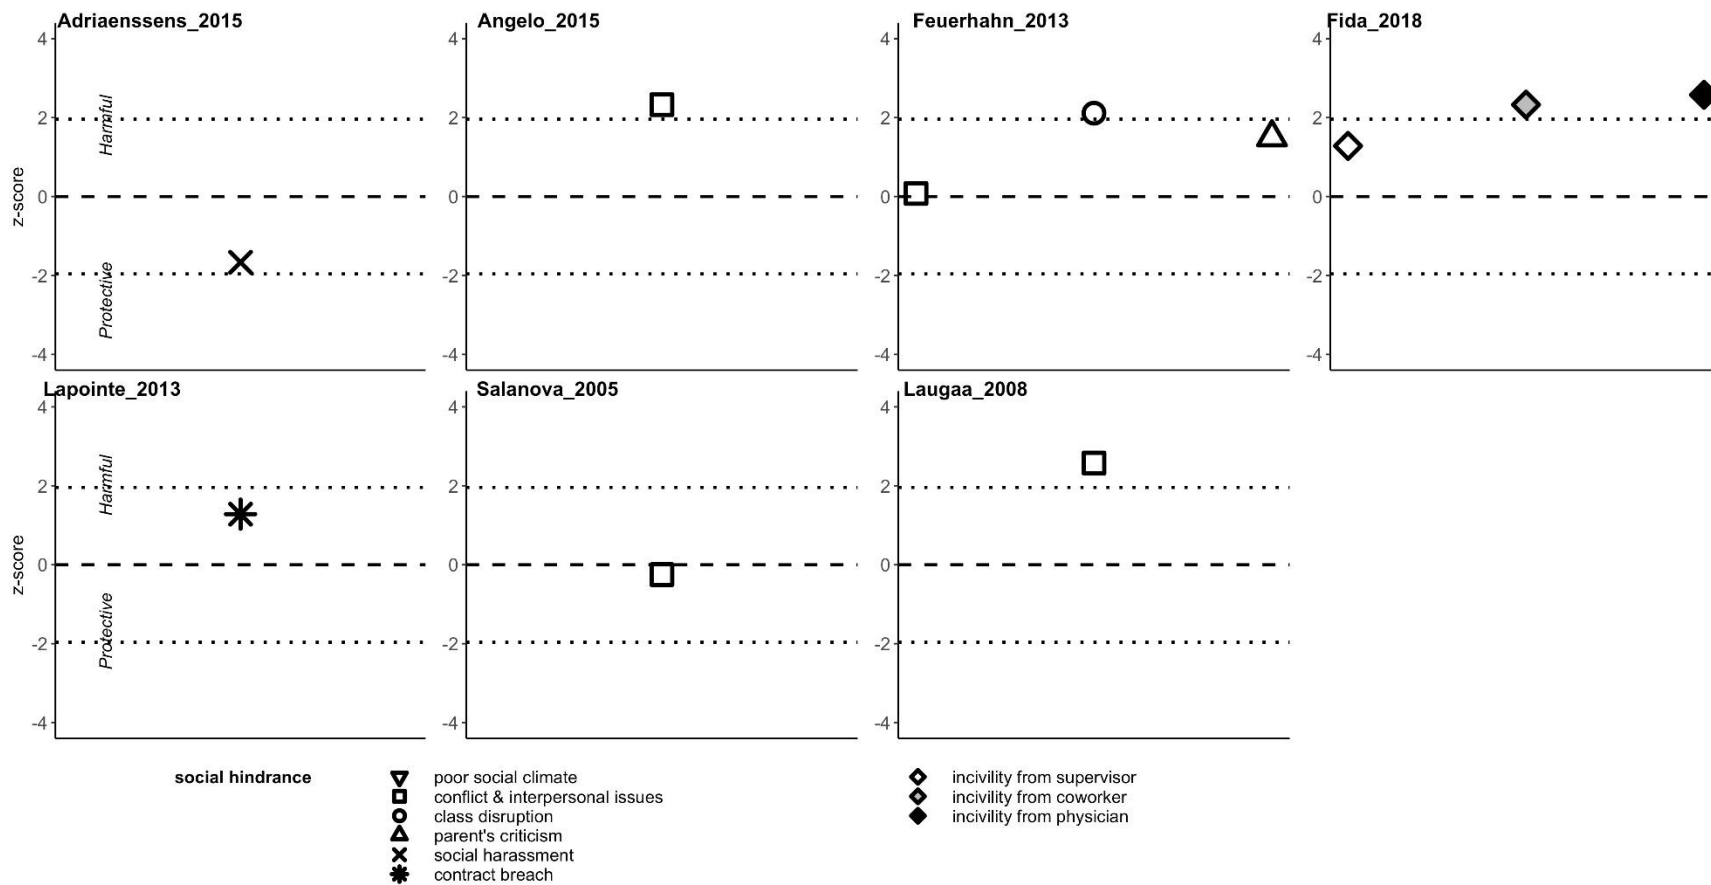

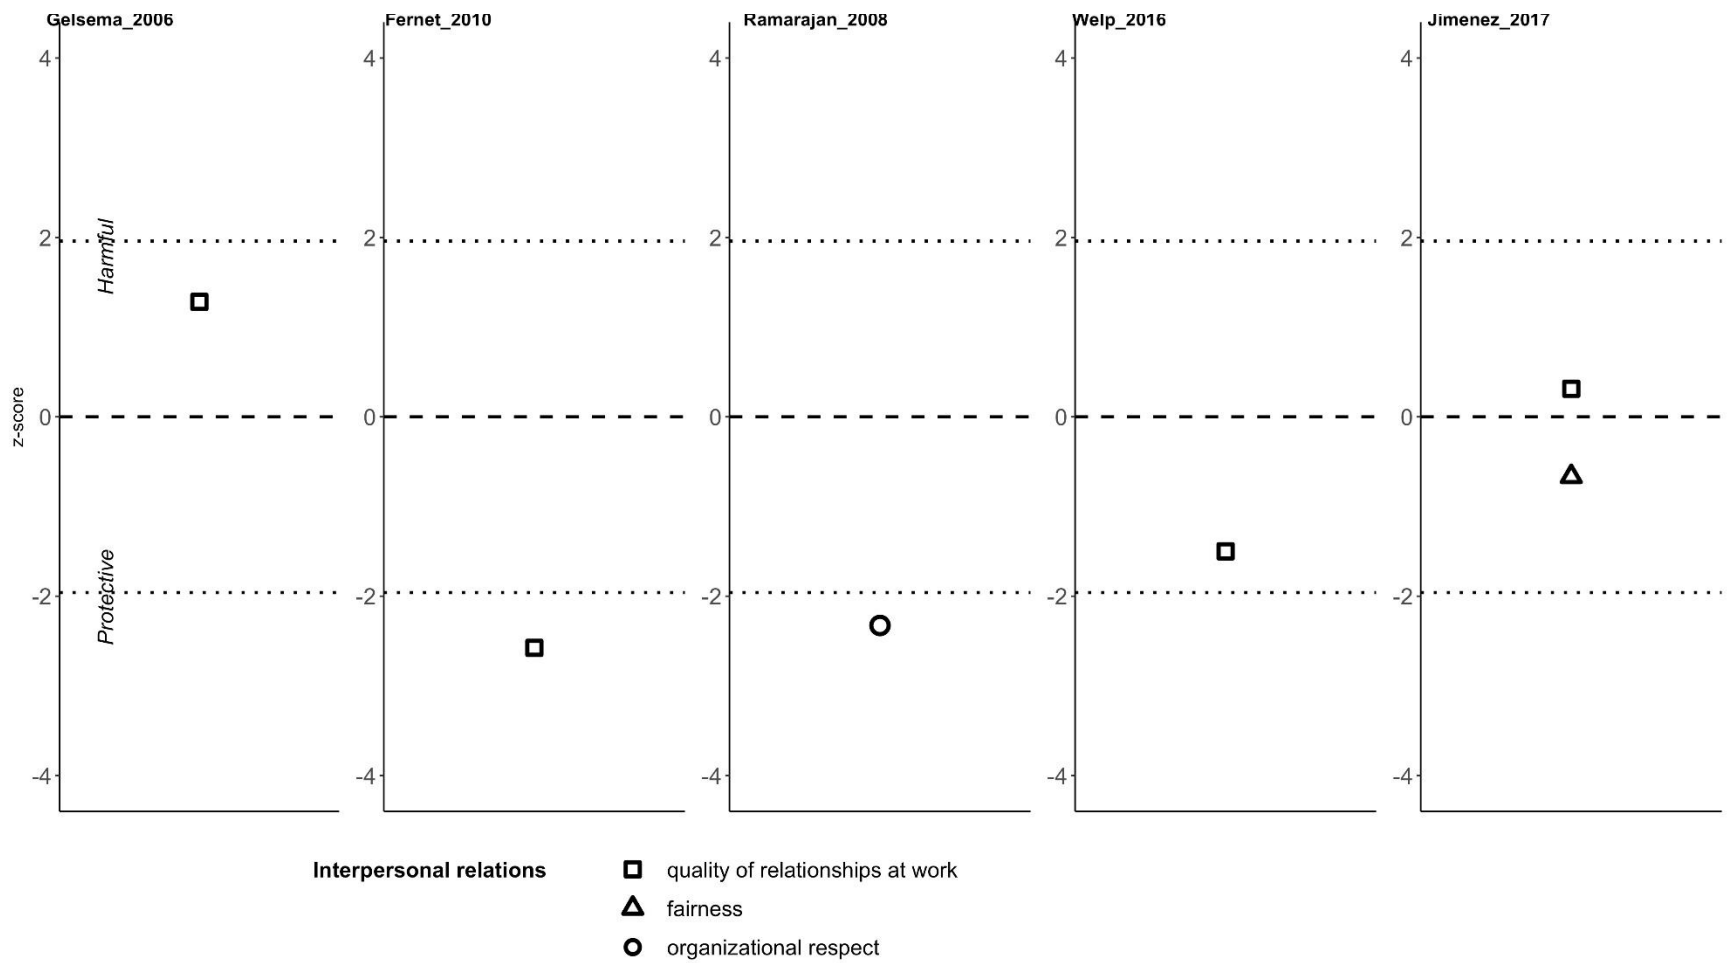

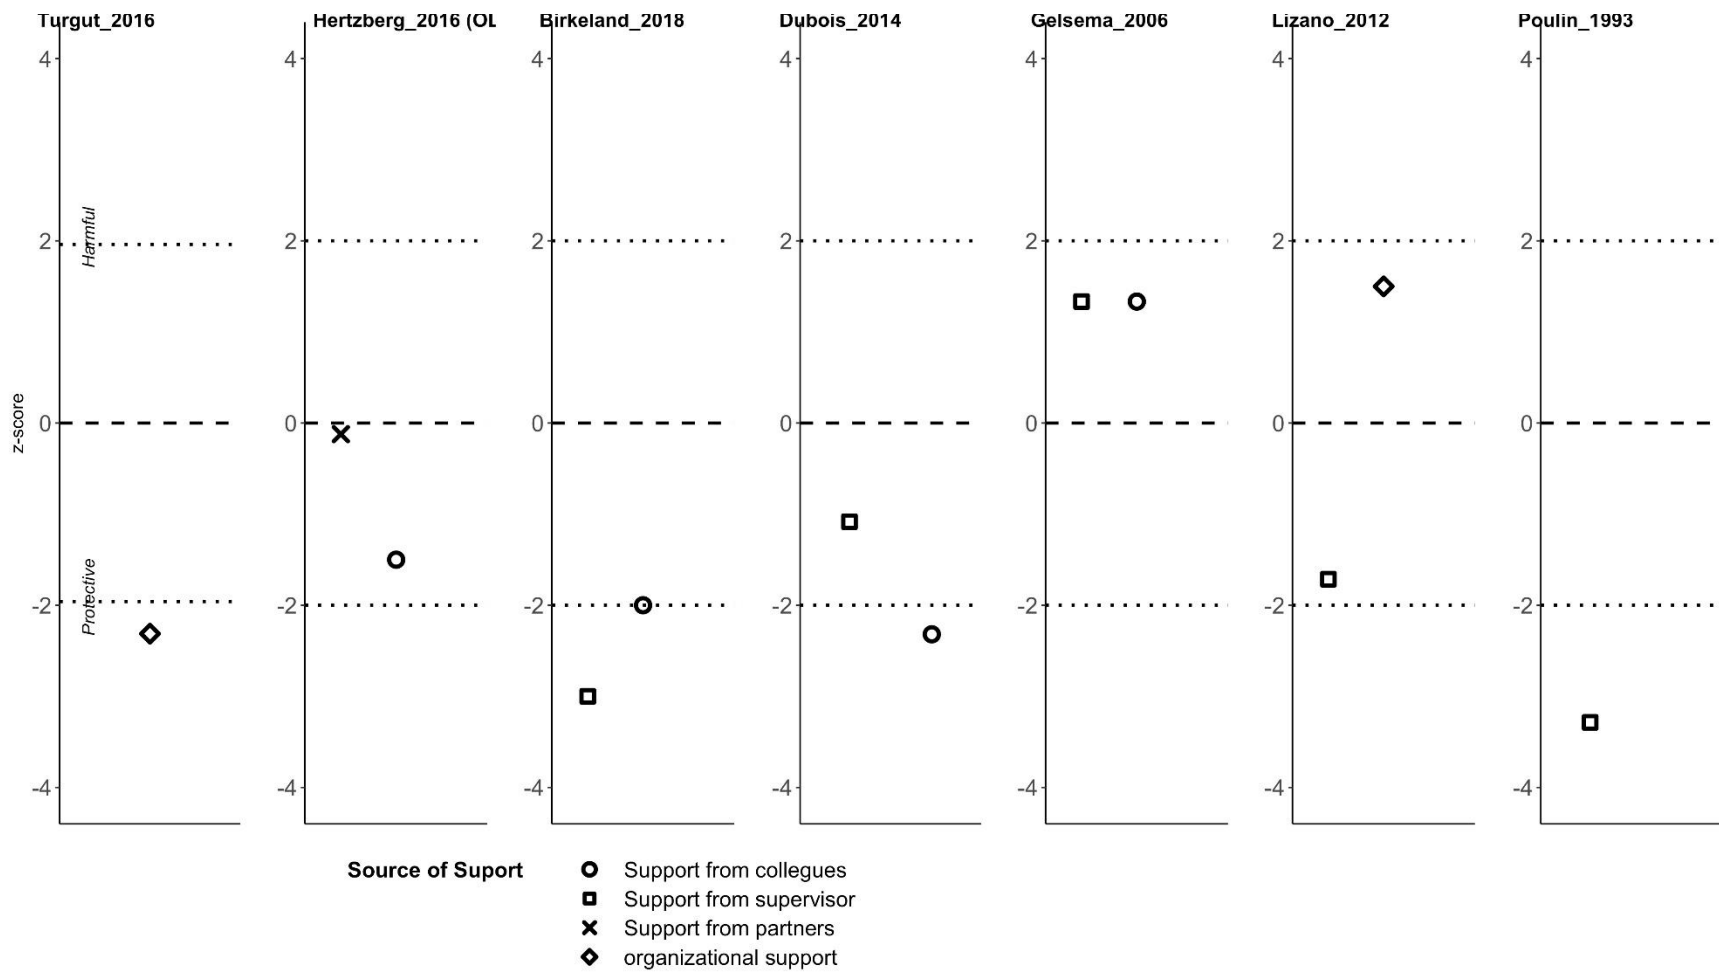

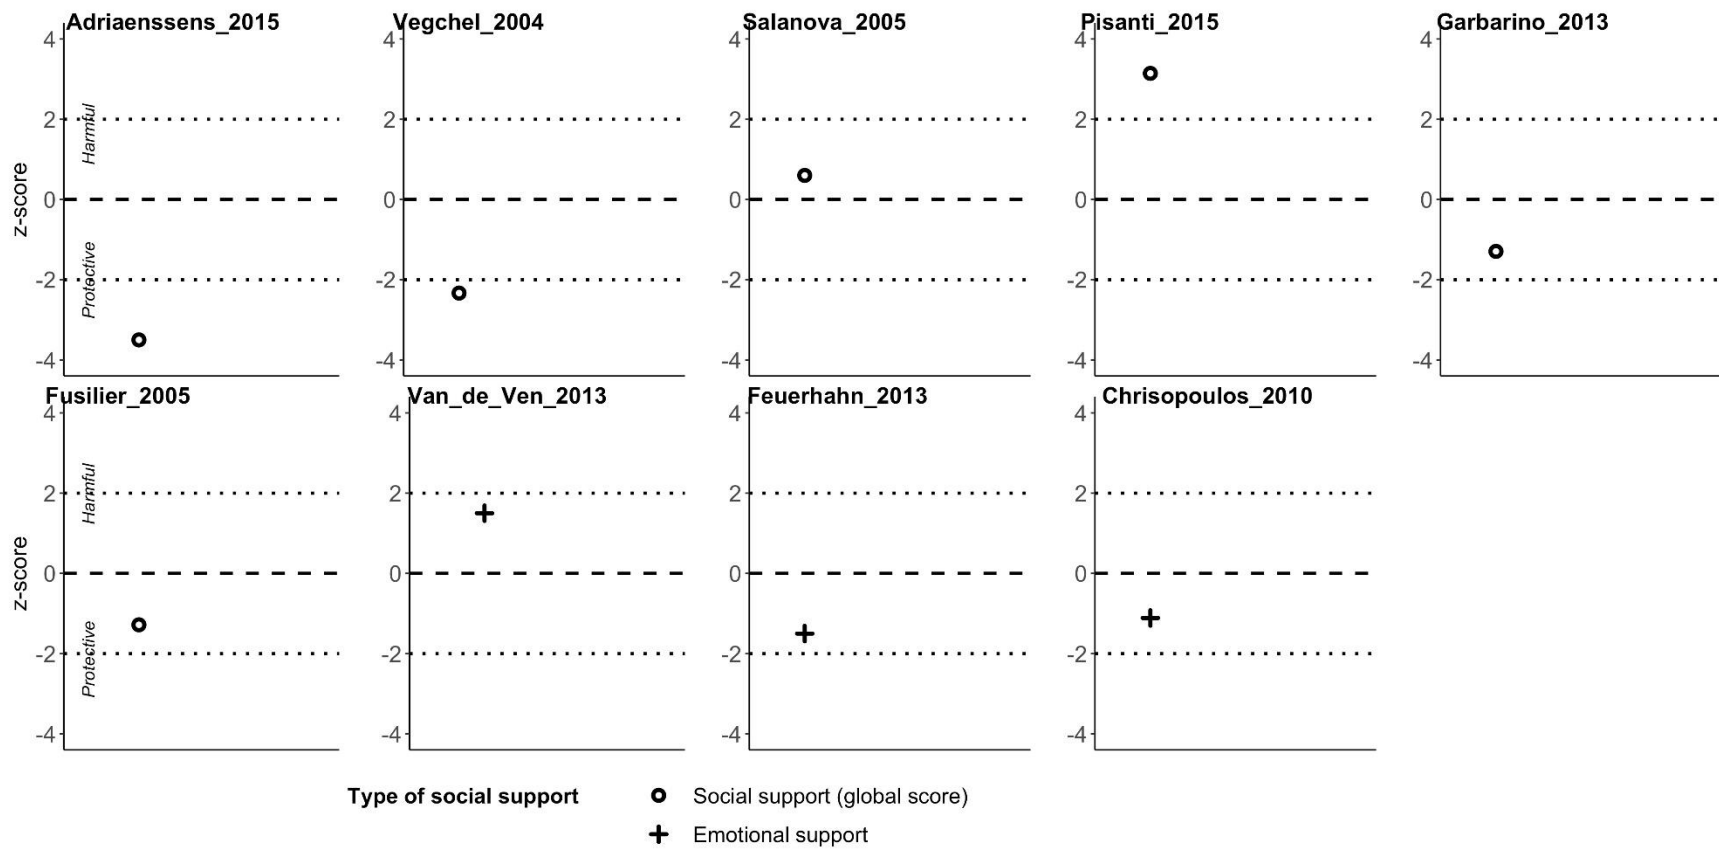

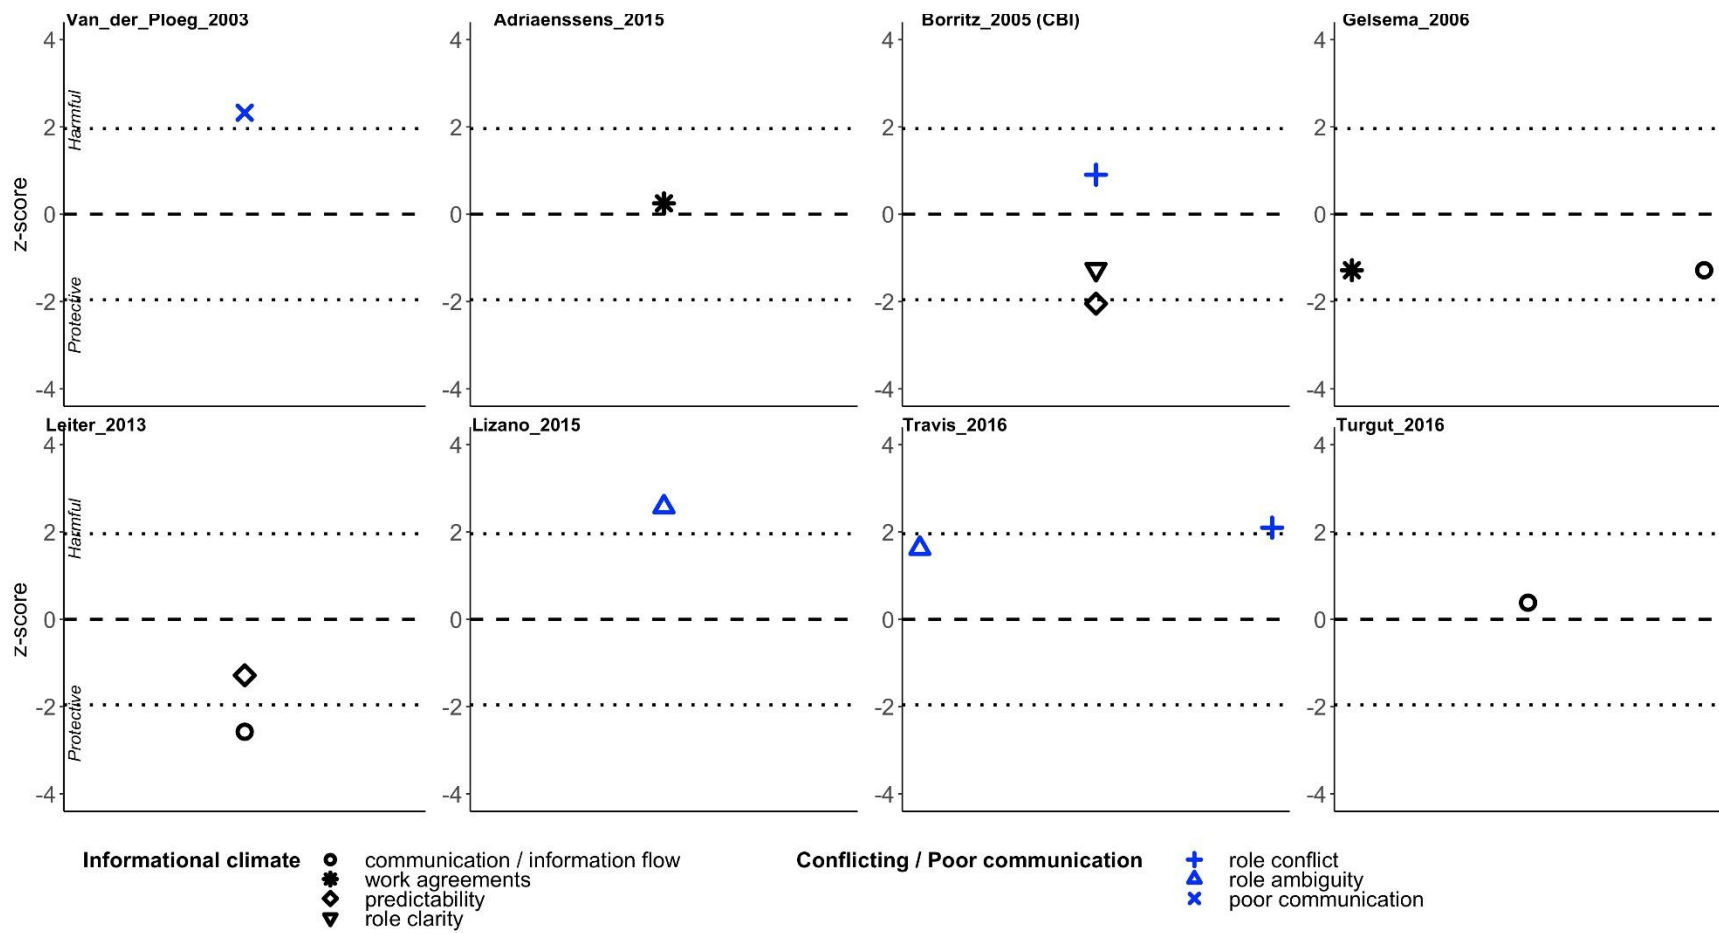

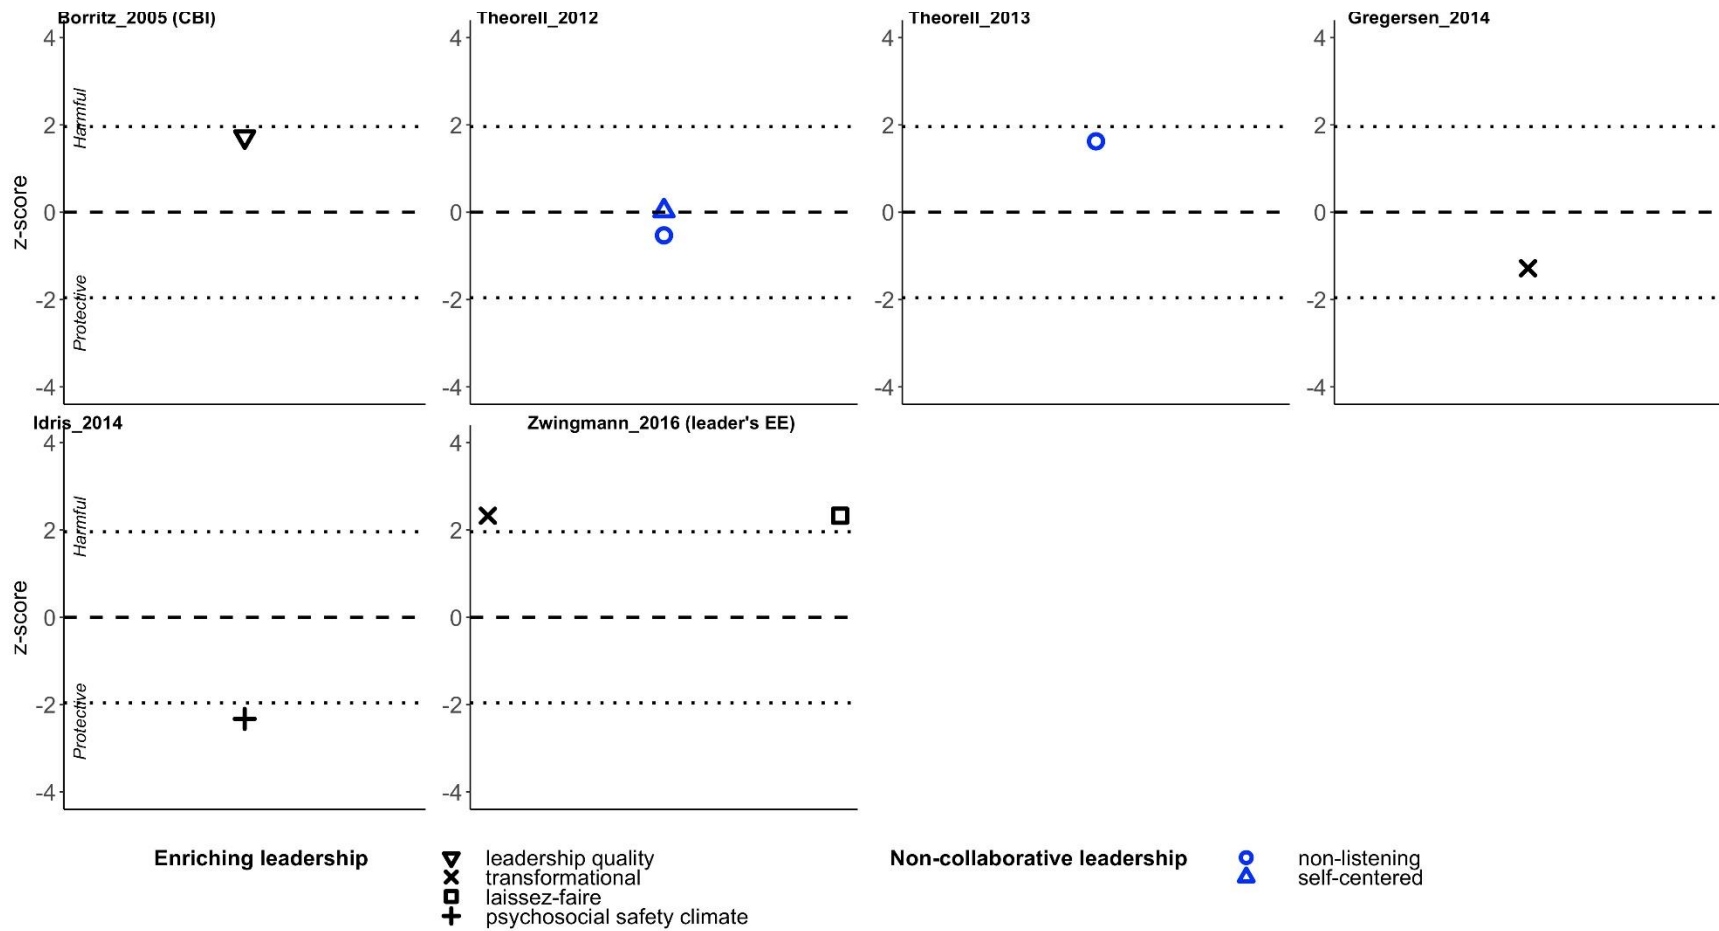

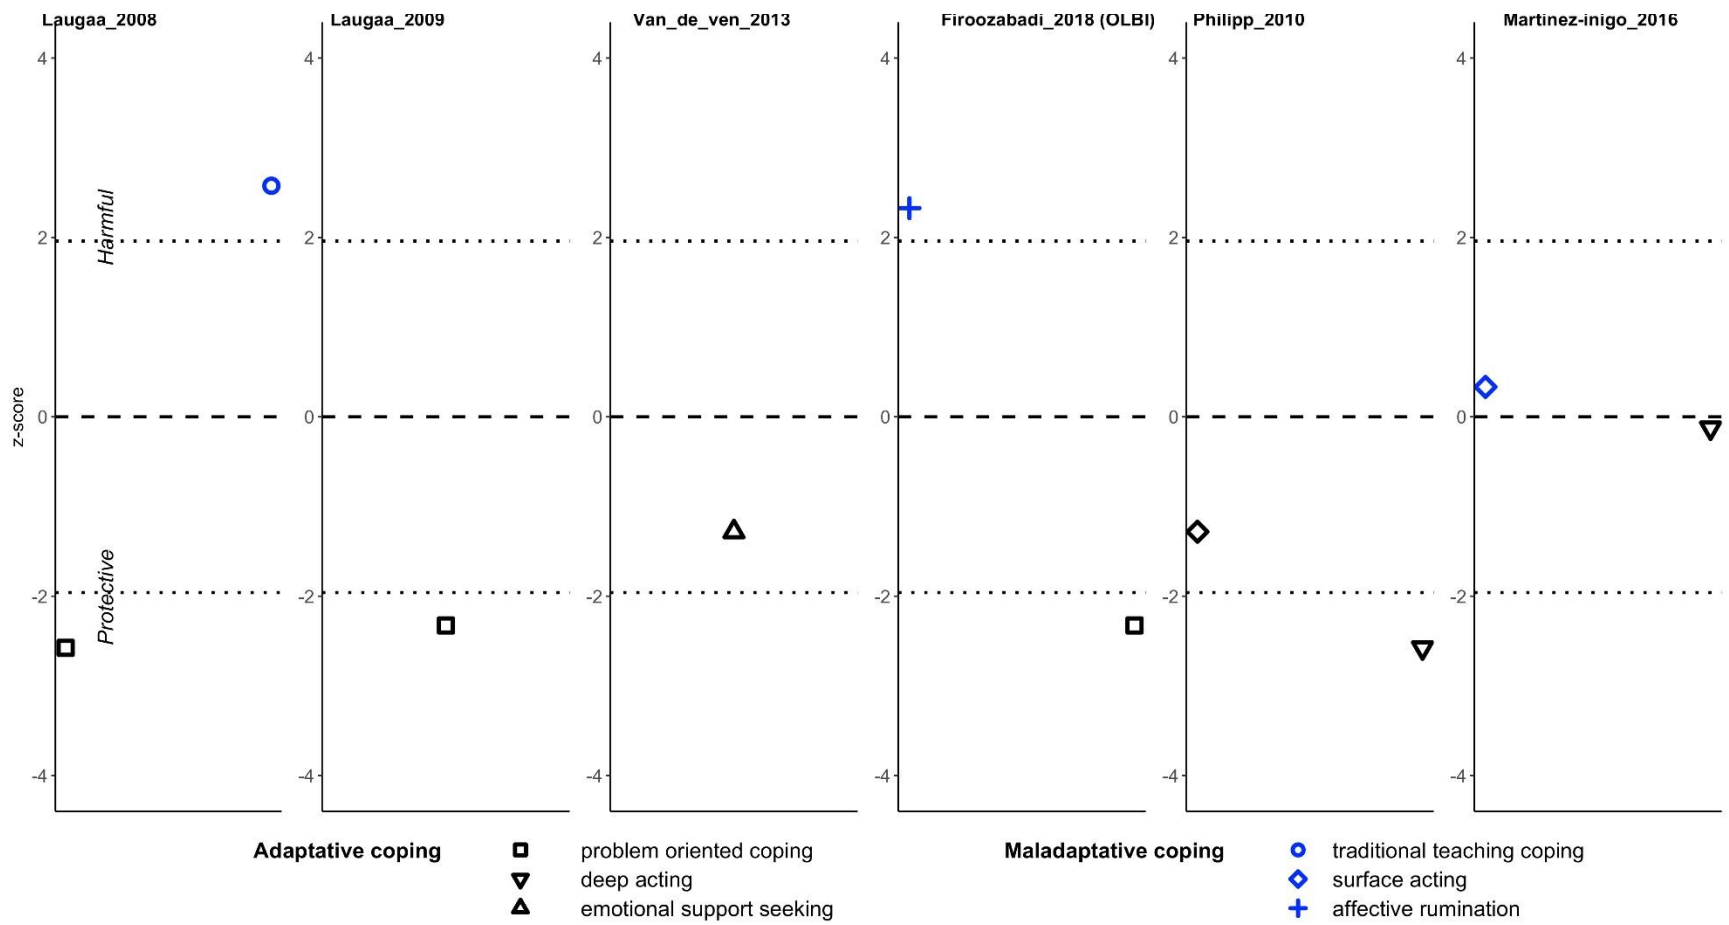

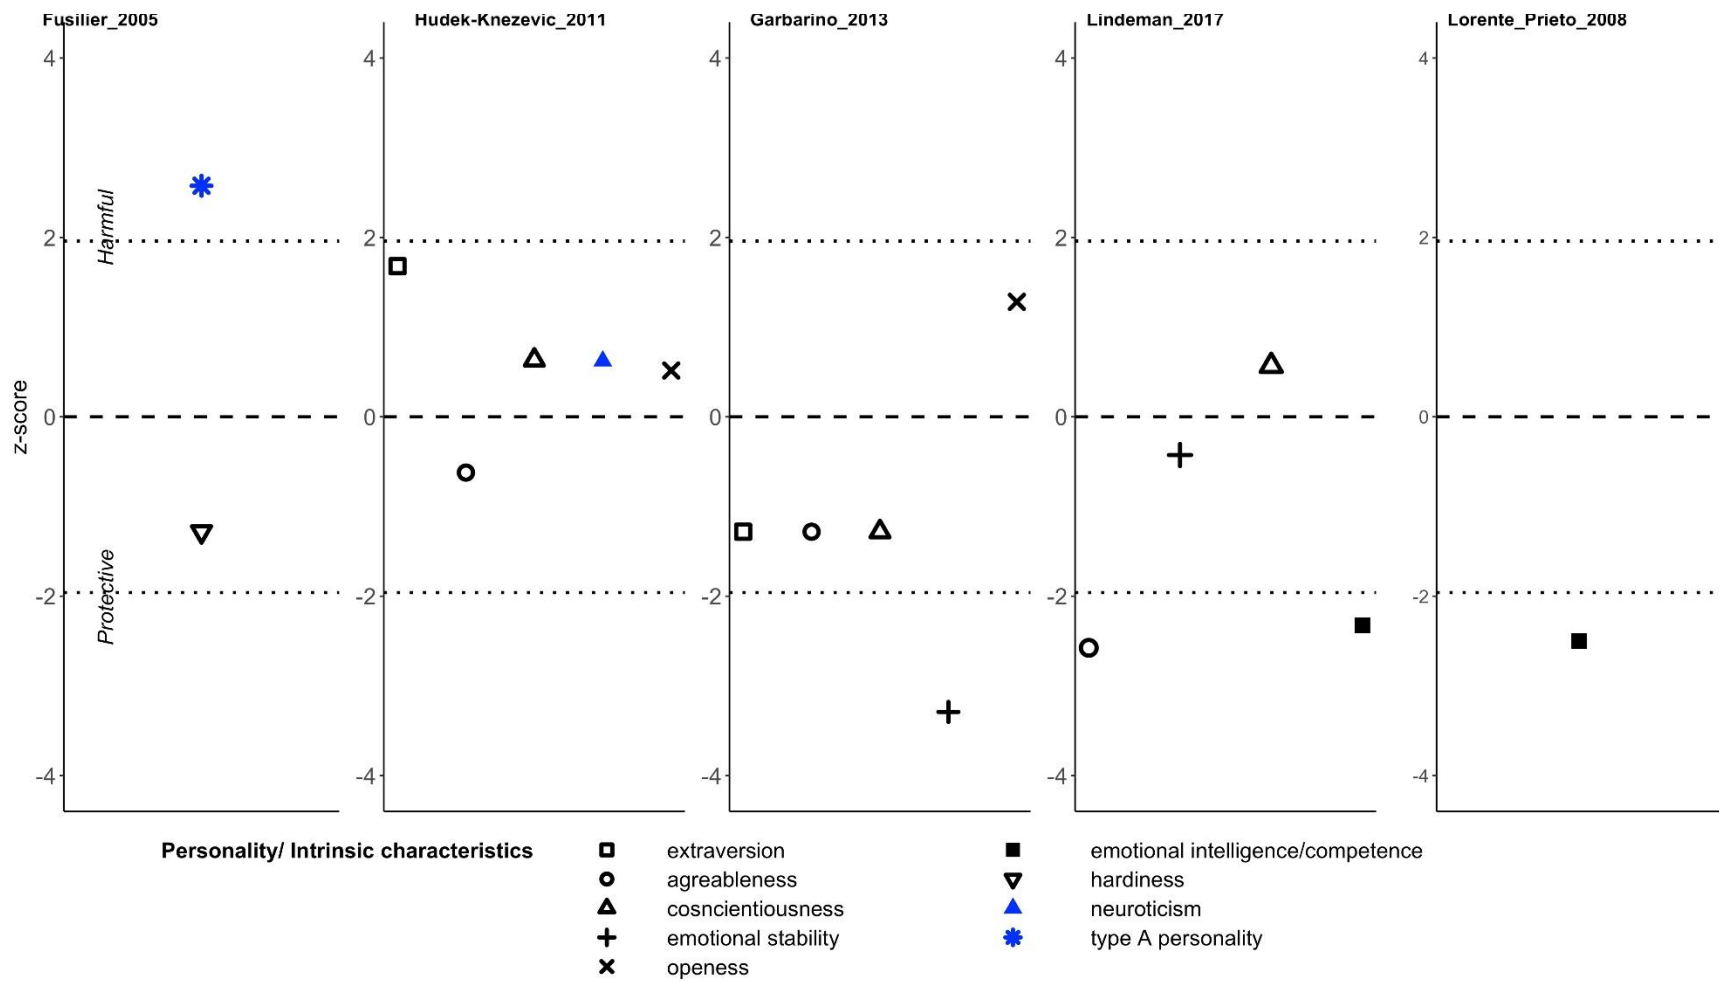

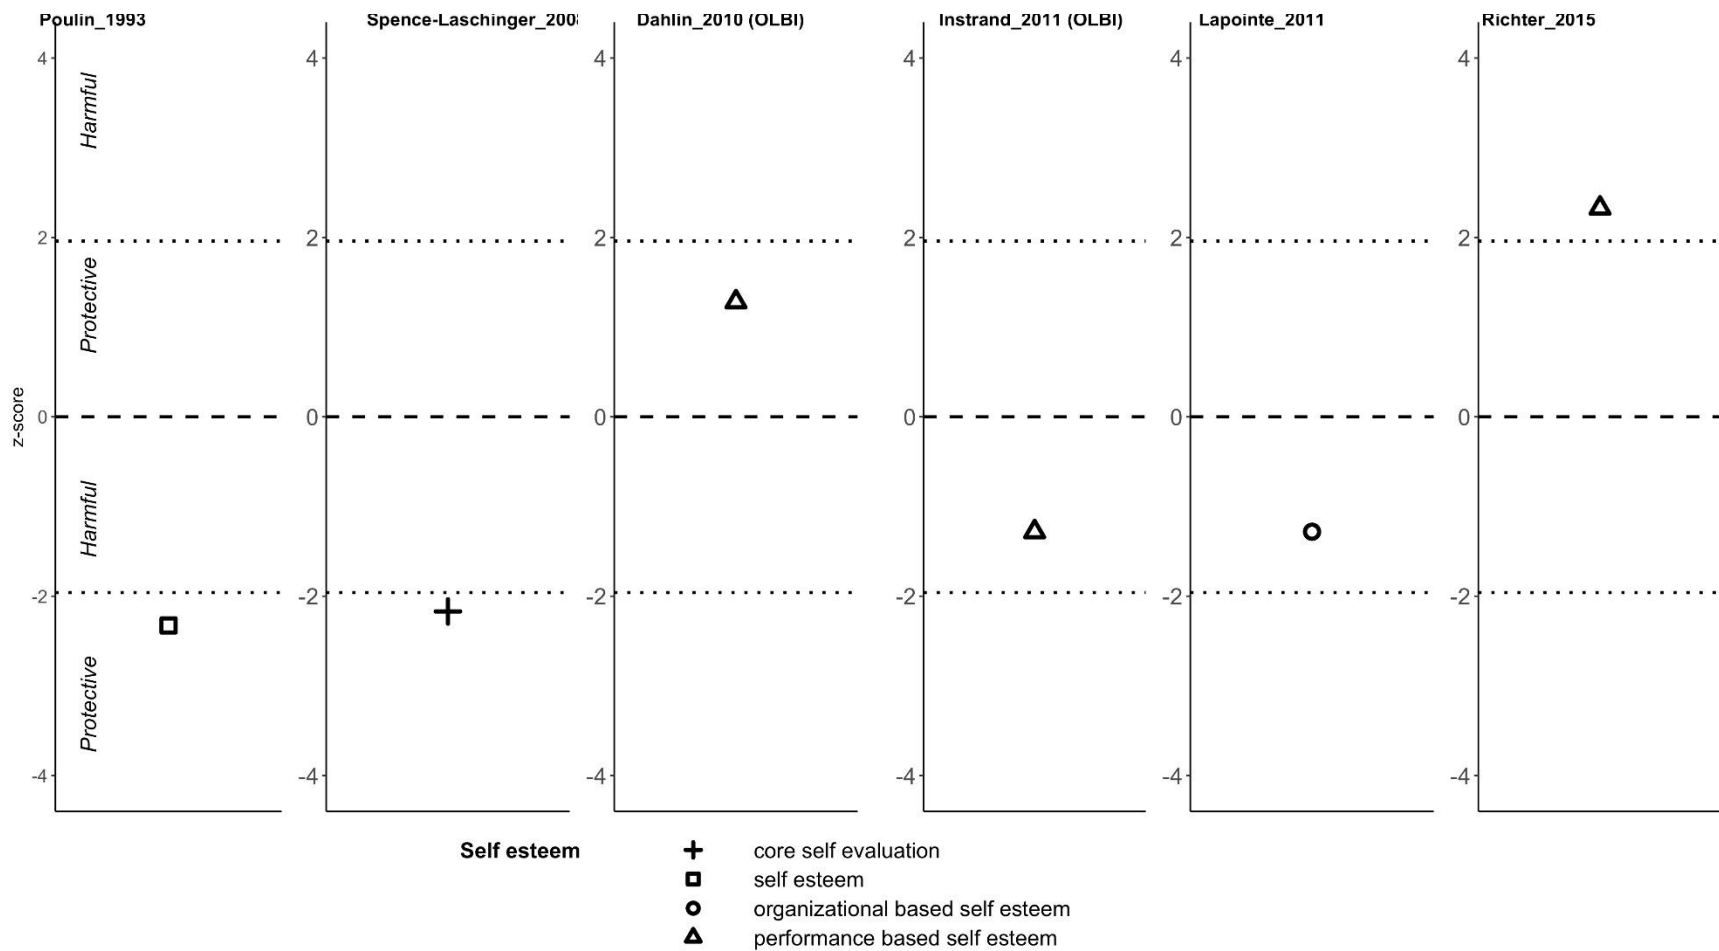

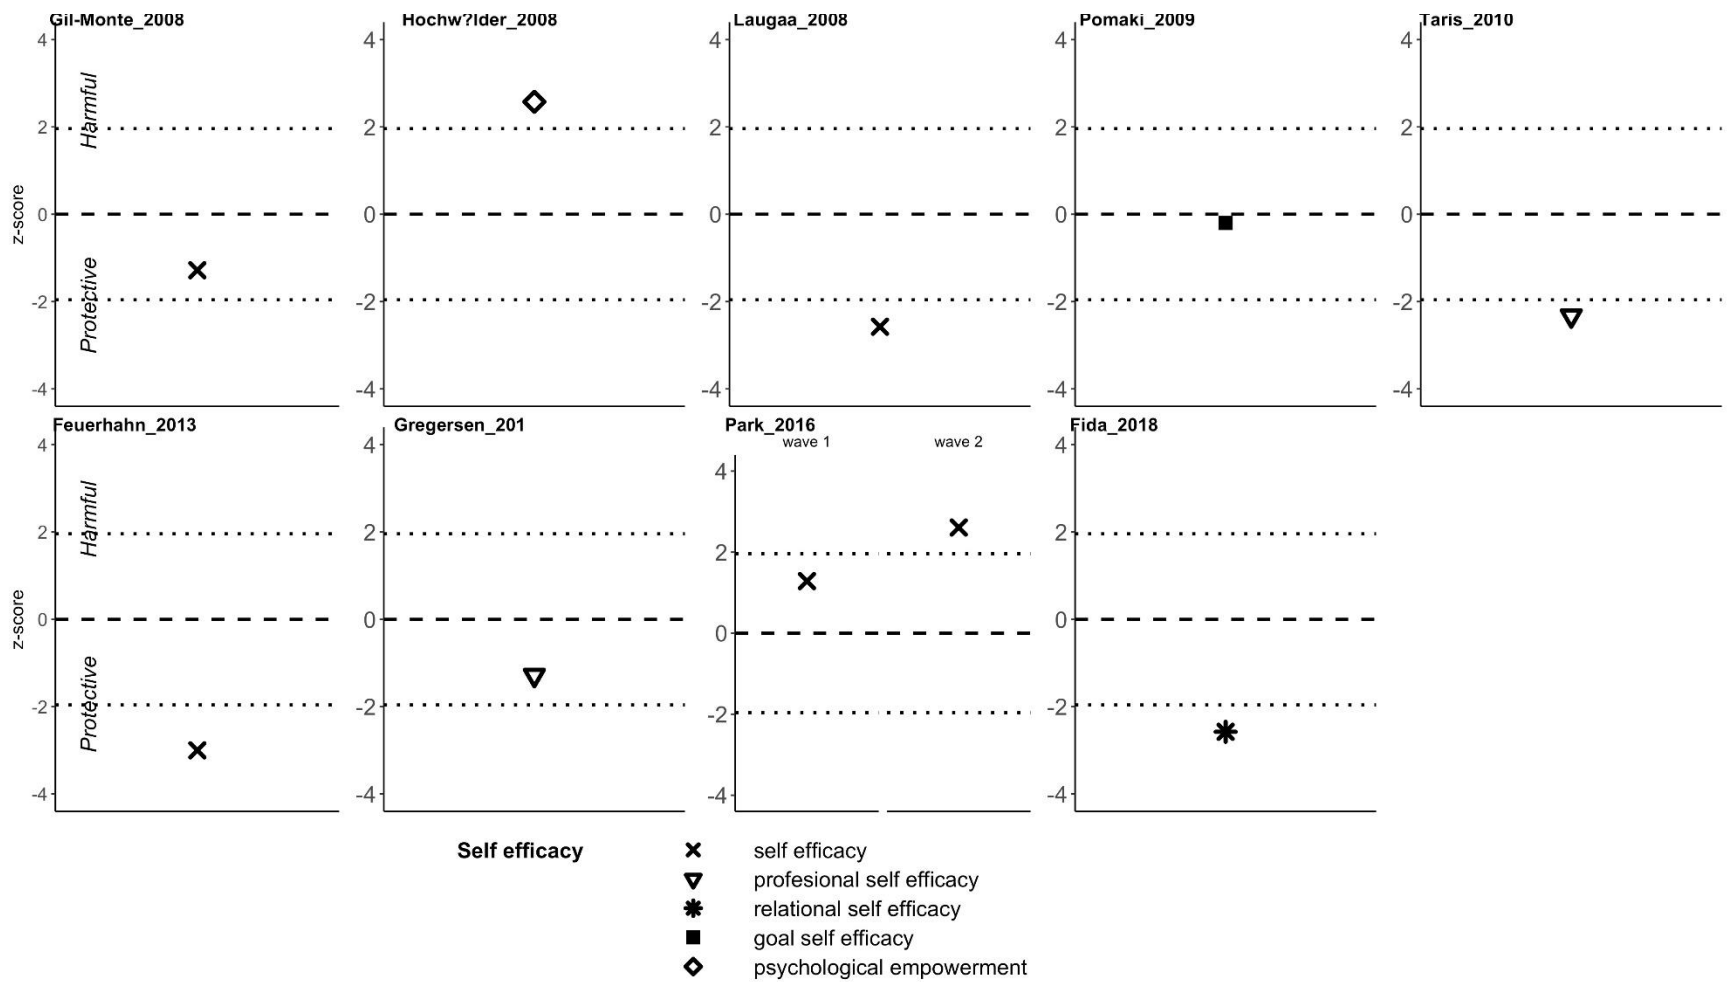

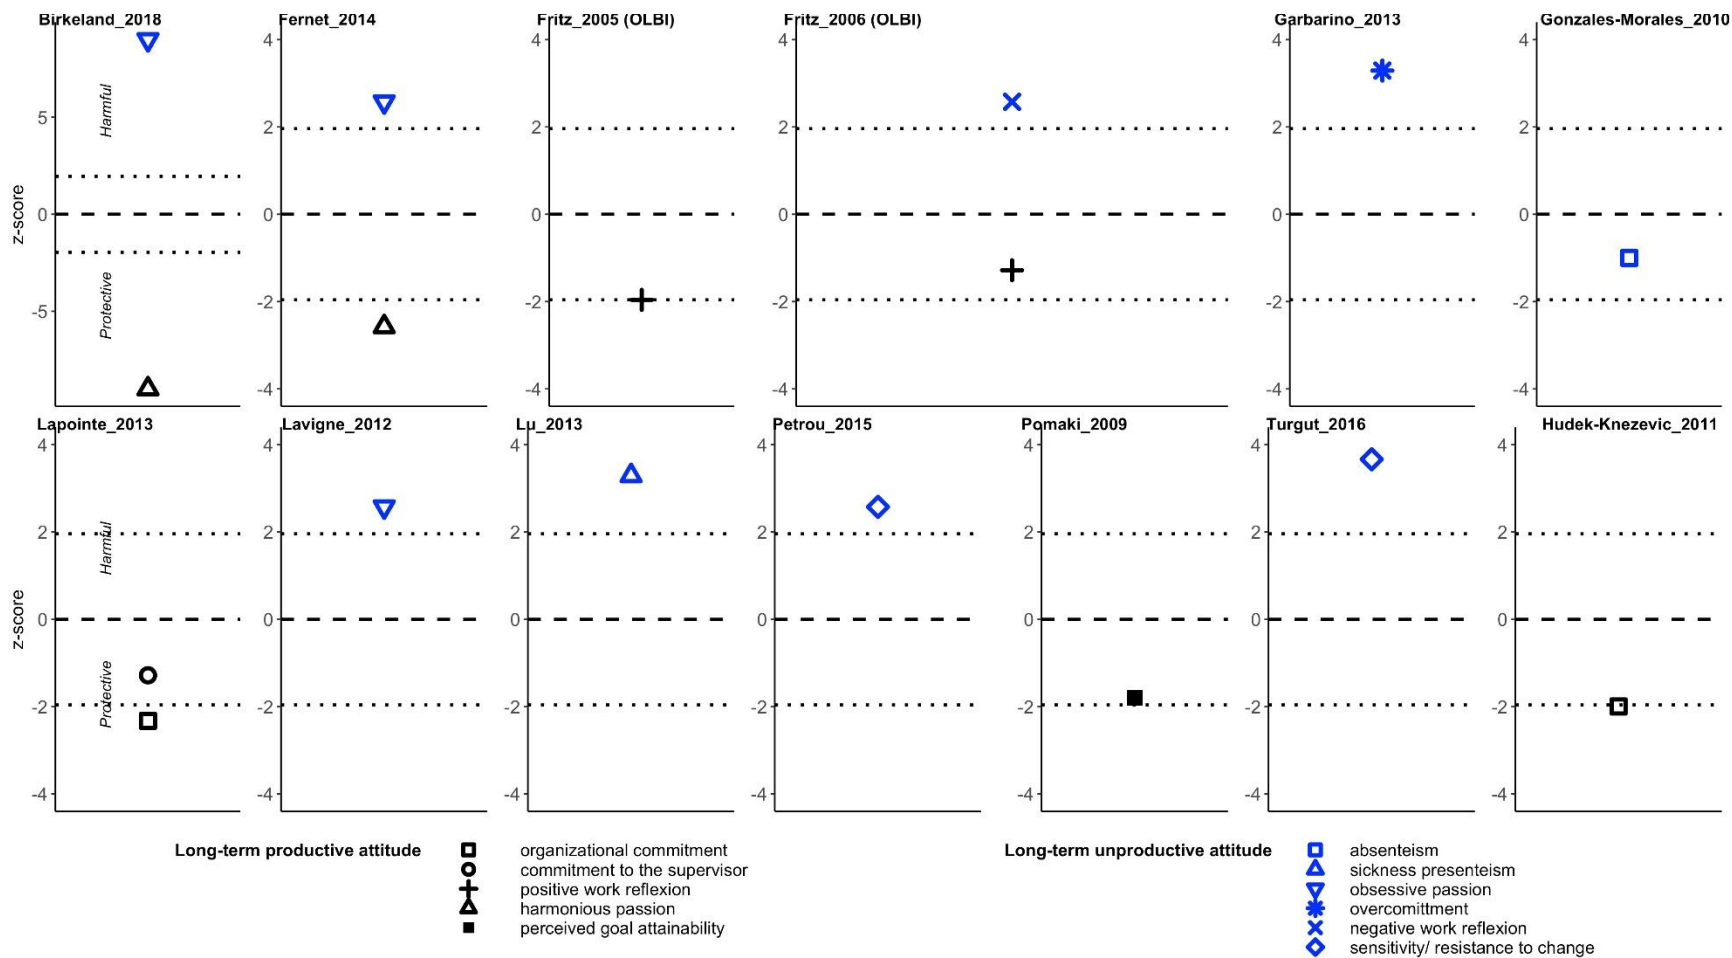

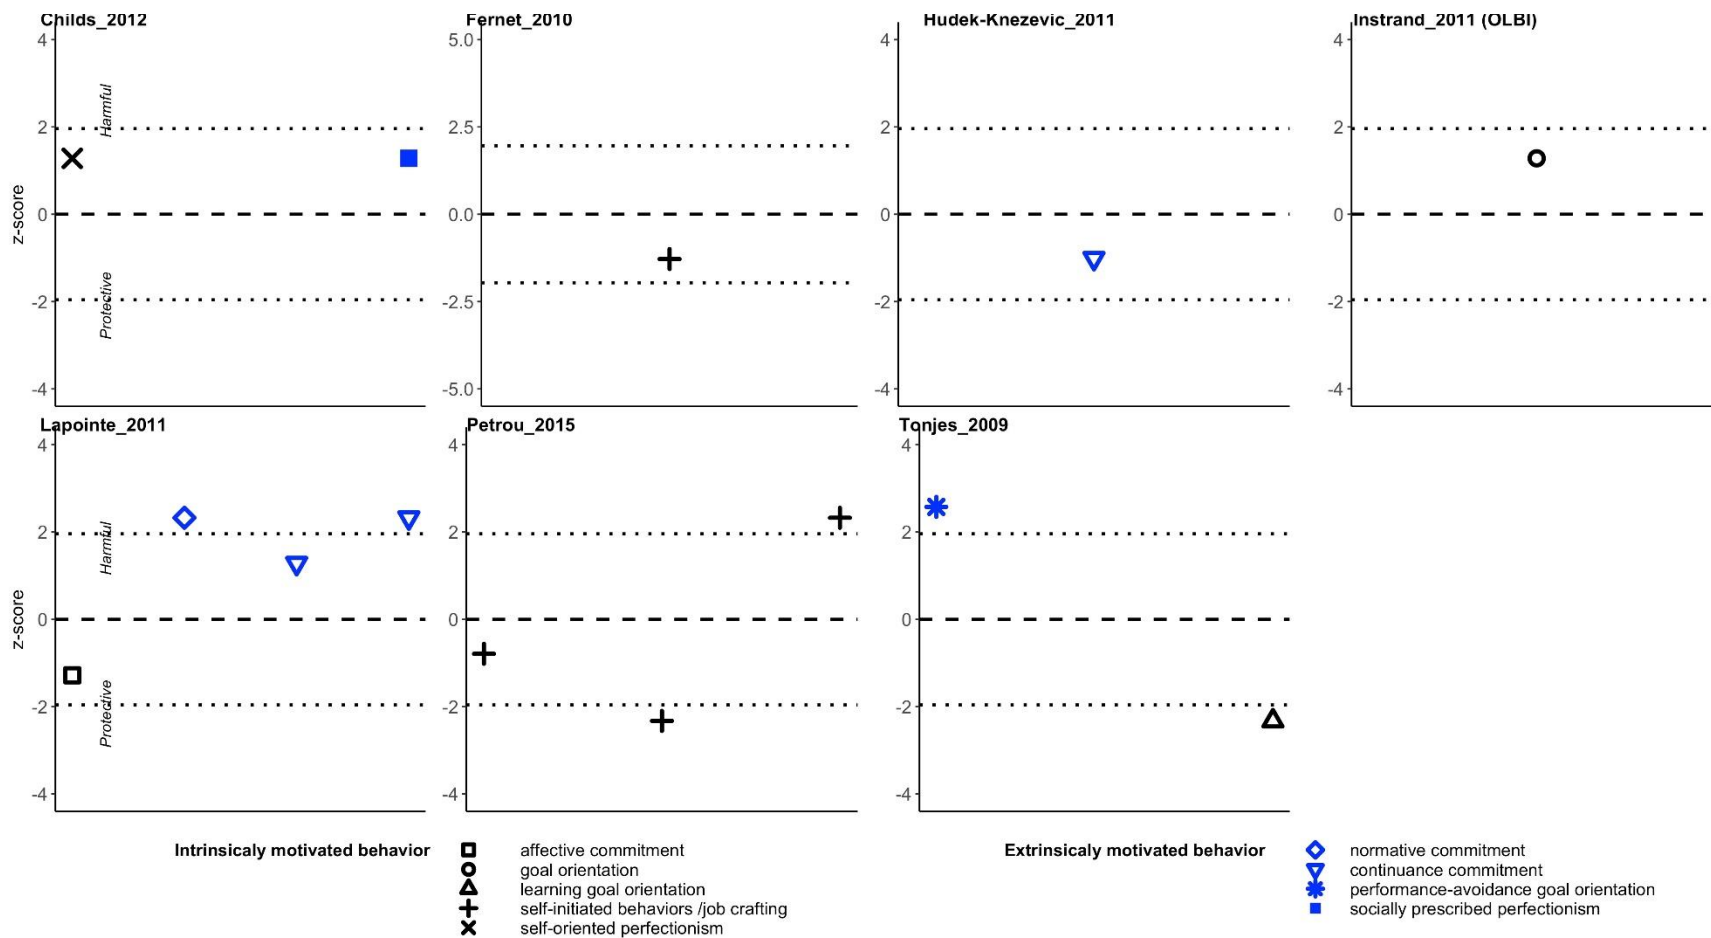

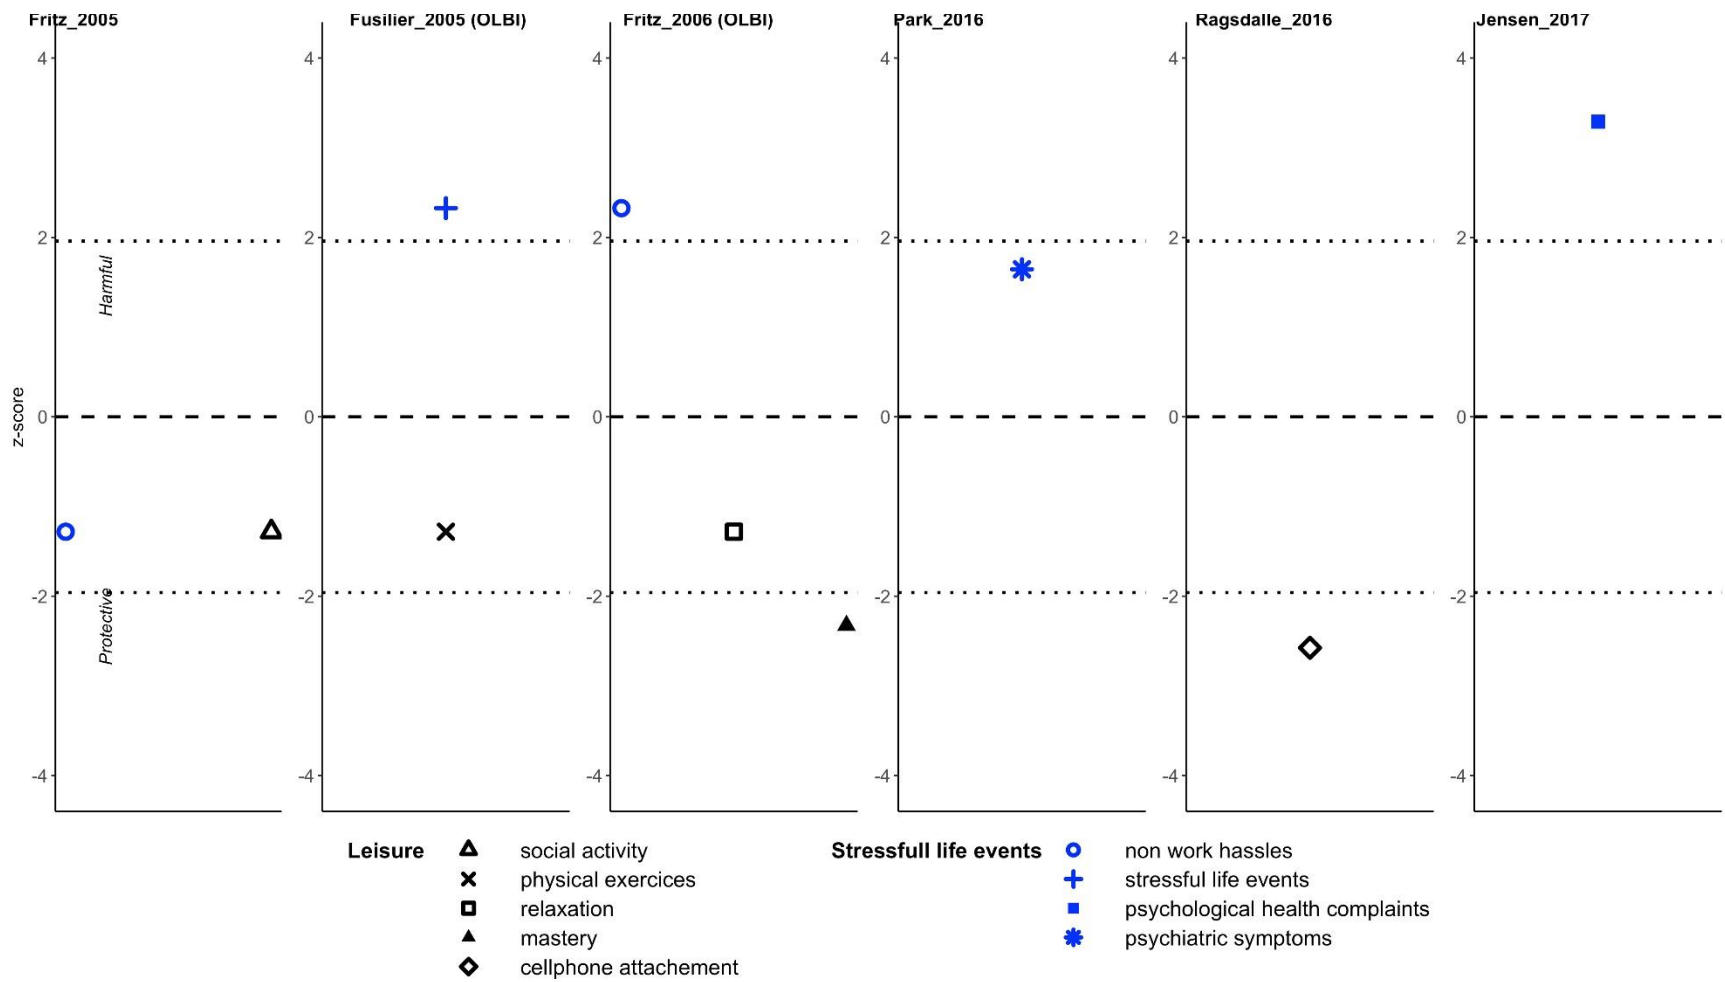

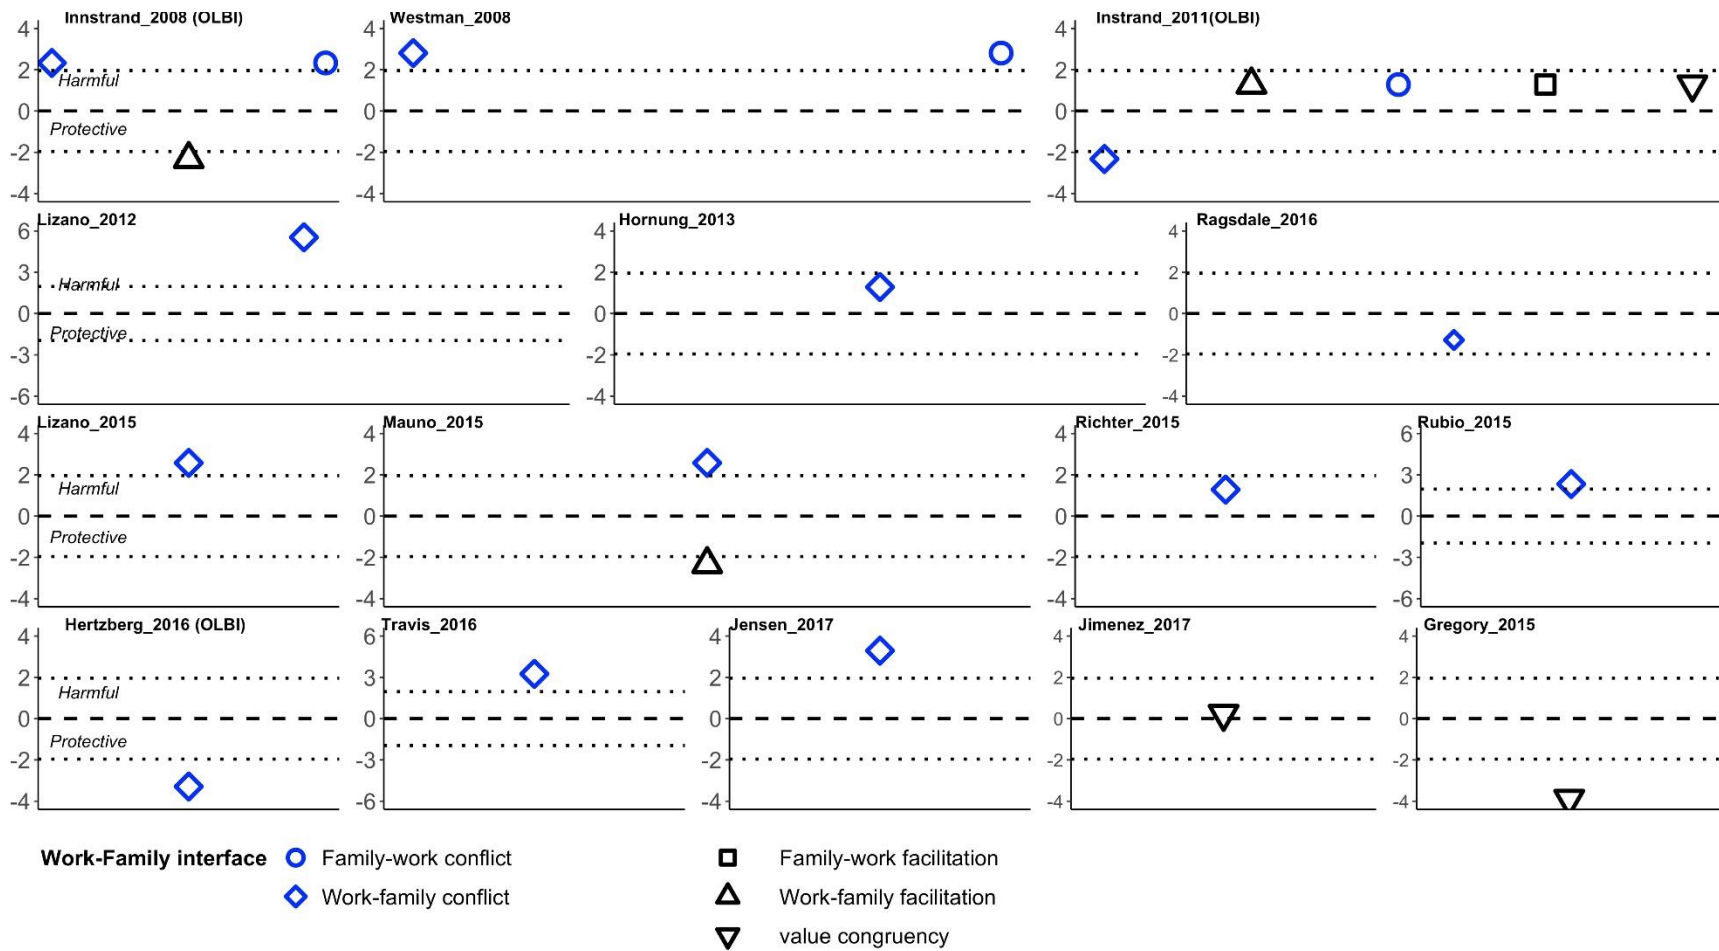

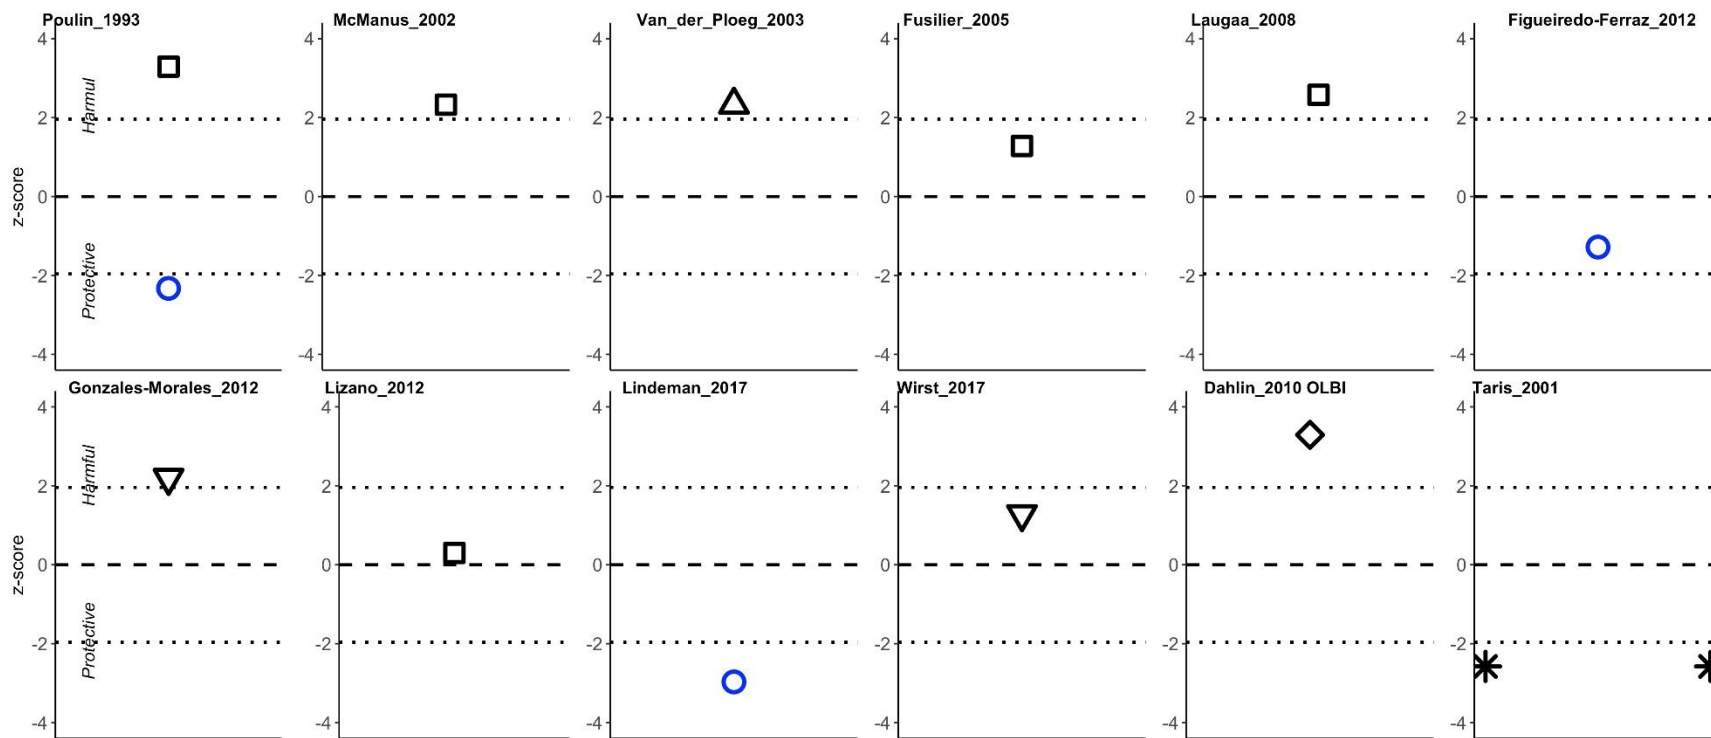

**Perceived intermediate work consequences**

- Job stress
- ▽ Colleagues/Team exhaustion
- \* Stress from work interactions
- △ Physical strain
- ◇ Job insecurity
- Work satisfaction
